# Supplementary material for: Deep mutational scanning of an antibody against epidermal growth factor receptor using mammalian cell display and massively parallel pyrosequencing
Source: PubMed Central journal article supplement — MAbs. 2013 May 29;5(4):523–32. doi: 10.4161/mabs.24979 (PMC3906306; doi:10.4161/mabs.24979), 2013-05-29
Supplement: mabs-5-523-s01.pdf [file mabs-5-523-s01.pdf]

## **Supplemental Material to:**

**Charles M. Forsyth, Veronica Juan, Yoshiko Akamatsu, Robert B. DuBridge, Minhtam Doan, Alexander V. Ivanov, Zhiyuan Ma, Dixie Polakoff, Jennifer Razo, Keith Wilson and David B. Powers**

**Deep mutational scanning of an antibody against epidermal growth factor receptor using mammalian cell display and massively parallel pyrosequencing**

**2013; 5(4)**

**<http://dx.doi.org/10.4161/mabs.24979>**

**<http://www.landesbioscience.com/journals/mabs/article/24979/>**

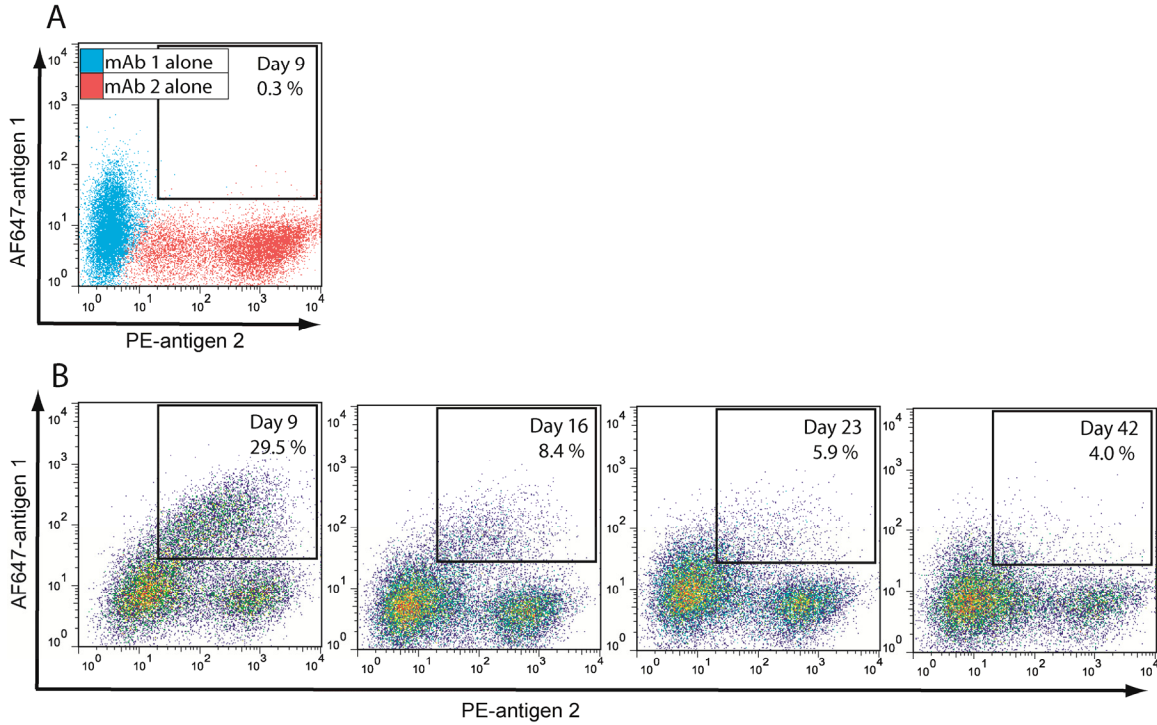

**Supplemental Figure S1.** Plasmid segregation over time to ensure every cell expressed a single clonal variant. Plasmids displaying two different antibodies are mixed equally and transformed into 293c18. Cells are removed from culture at various time points post-transfection and stained with a mix of the two antigens directly labeled with different fluorescent tags. Panel A shows cells expressing only one plasmid and incubated with 5nM AF647-antigen 1 and 5nM phycoerythrin (PE)-labeled antigen 2 on day 9. The percent double positive in the gate is show below the staining day. Antibody 1 has a lower surface expression level as compared to antibody 2, resulting in a reduced binding to antigen 1 and a lower fluorescence intensity. Panel B shows the mix of two antibodies segregating over time when incubated with both antigens on day 9, 16, 23, and 42.

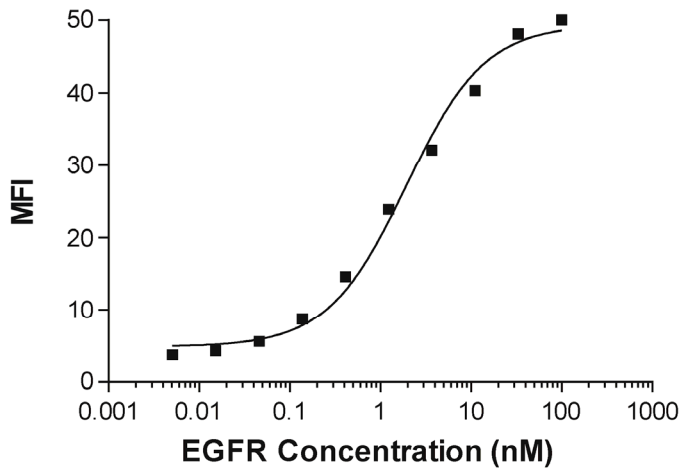

**Supplemental Figure S2.** FACS titration of displayed hu225 wild type. Cells expressing hu225 wild type were incubated with AF647-EGFR-C $\lambda$  and phycoerythrin (PE)-labeled anti-human kappa to normalize for IgG expression, then analyzed by FACS.  $K_D=1.9$  nM (95% confidence interval of 1.3nM - 2.8nM).

| <b>A) Library synthesis error rate based on ABI sequencing of library clones</b>                          |             |              |             |                     |                 |              |
|-----------------------------------------------------------------------------------------------------------|-------------|--------------|-------------|---------------------|-----------------|--------------|
|                                                                                                           | read length | number reads | total bases | insertion/deletions | point mutations | combined     |
| light chain                                                                                               | 324         | 125          | 40,500      | 2                   | 36              | 38           |
| heavy chain                                                                                               | 357         | 91           | 32,487      | 0                   | 12              | 12           |
| combined                                                                                                  |             | 216          | 72,987      | 2 (0.003%)          | 48 (0.066%)     | 50 (0.068%)  |
| <b>B) Pyrosequencing error rate estimates based on analysis of framework regions from expression gate</b> |             |              |             |                     |                 |              |
|                                                                                                           | read length | number reads | total bases | insertion/deletions | point mutations | combined     |
| light chain                                                                                               | 141         | 323          | 45,543      | 28                  | 62              | 90           |
| heavy chain                                                                                               | 111         | 349          | 38,739      | 98                  | 29              | 127          |
| combined                                                                                                  |             | 672          | 84,282      | 126 (0.149%)        | 91 (0.108%)     | 217 (0.257%) |

**Supplemental Figure S3.** Error rate analysis for library synthesis and pyrosequencing. A) Library error rate was determined from ABI sequences of 216 complete variable regions, where any differences outside of a single variant CDR codon in each variable region were scored as synthesis errors. Of 216 library clones, 7 (3.2%) had more than one mutant codon within a CDR. B) Pyrosequencing apparent errors (which are the sum of sequencing errors plus library synthesis errors) were determined by analysis of framework regions from 672 sequence reads from the expression gate.

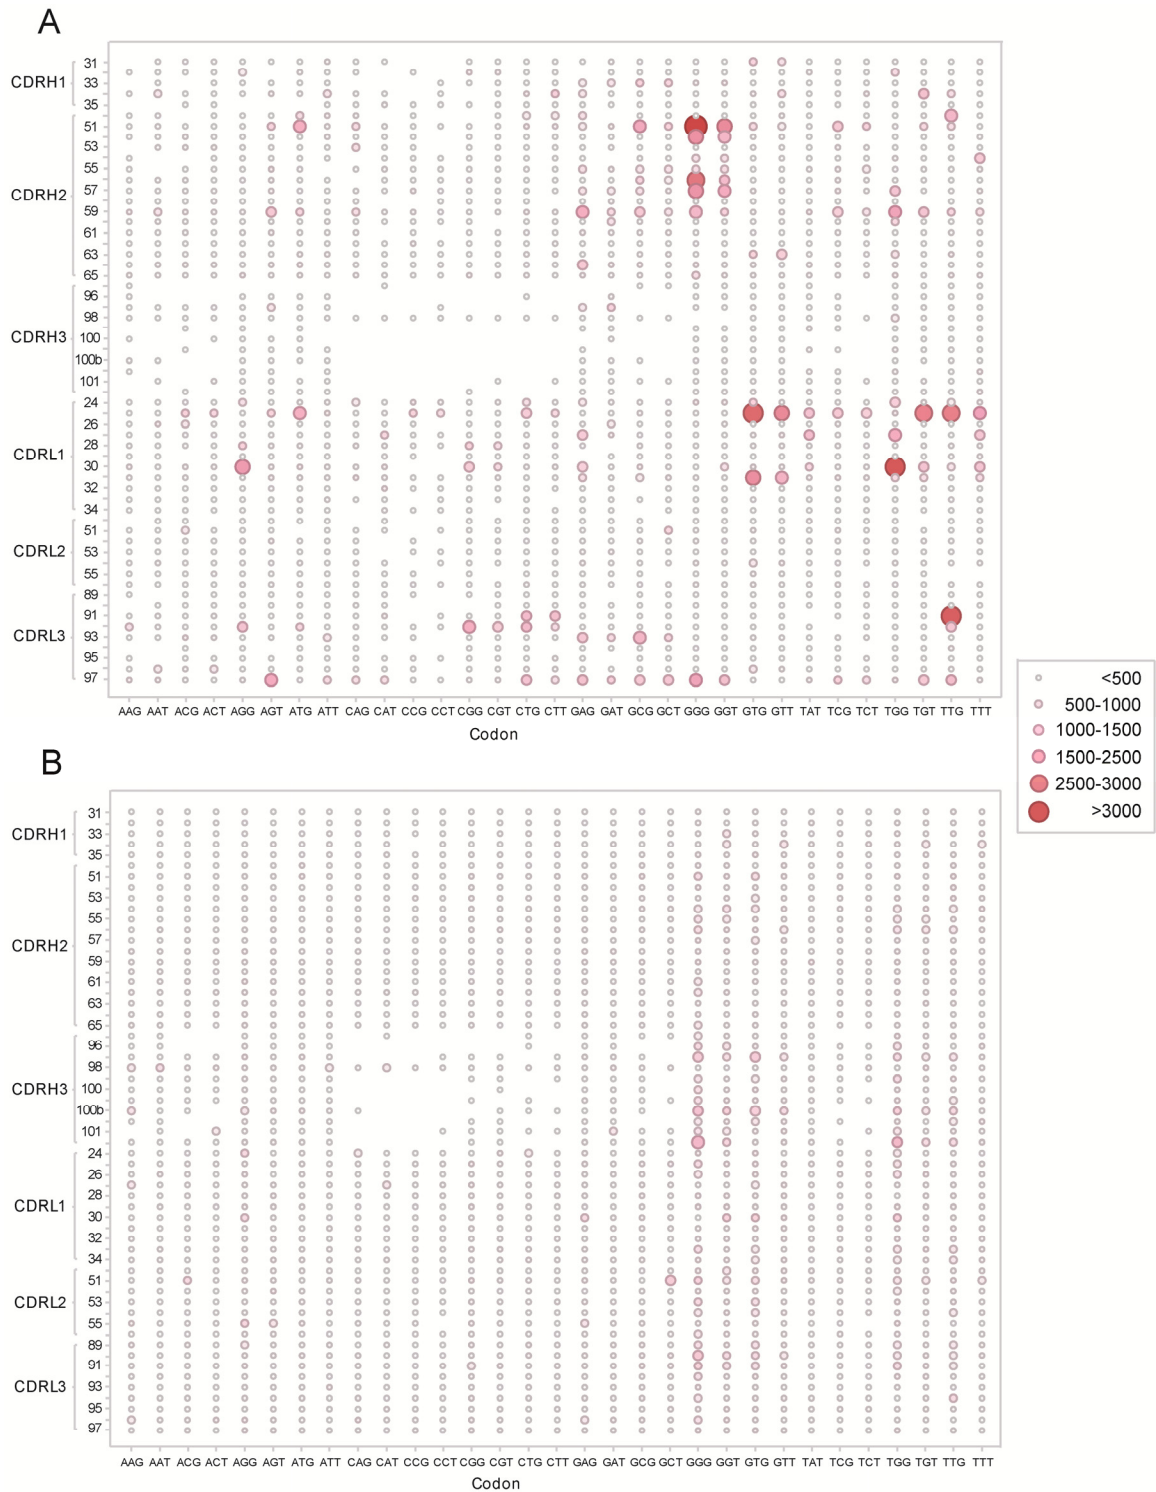

**Supplemental Figure S4.** Frequencies of codon variants within the binding (A) and expression (B) gates from hu225 library FACS sorting as determined by pyrosequencing. X axis show 31 possible NNK codons (excluding TAG nonsense codon); Y axis shows identity of 59 CDR positions in the library. Number of sequence reads for each variant is shown as a bubble plot where size and color of bubble corresponds to number of reads.

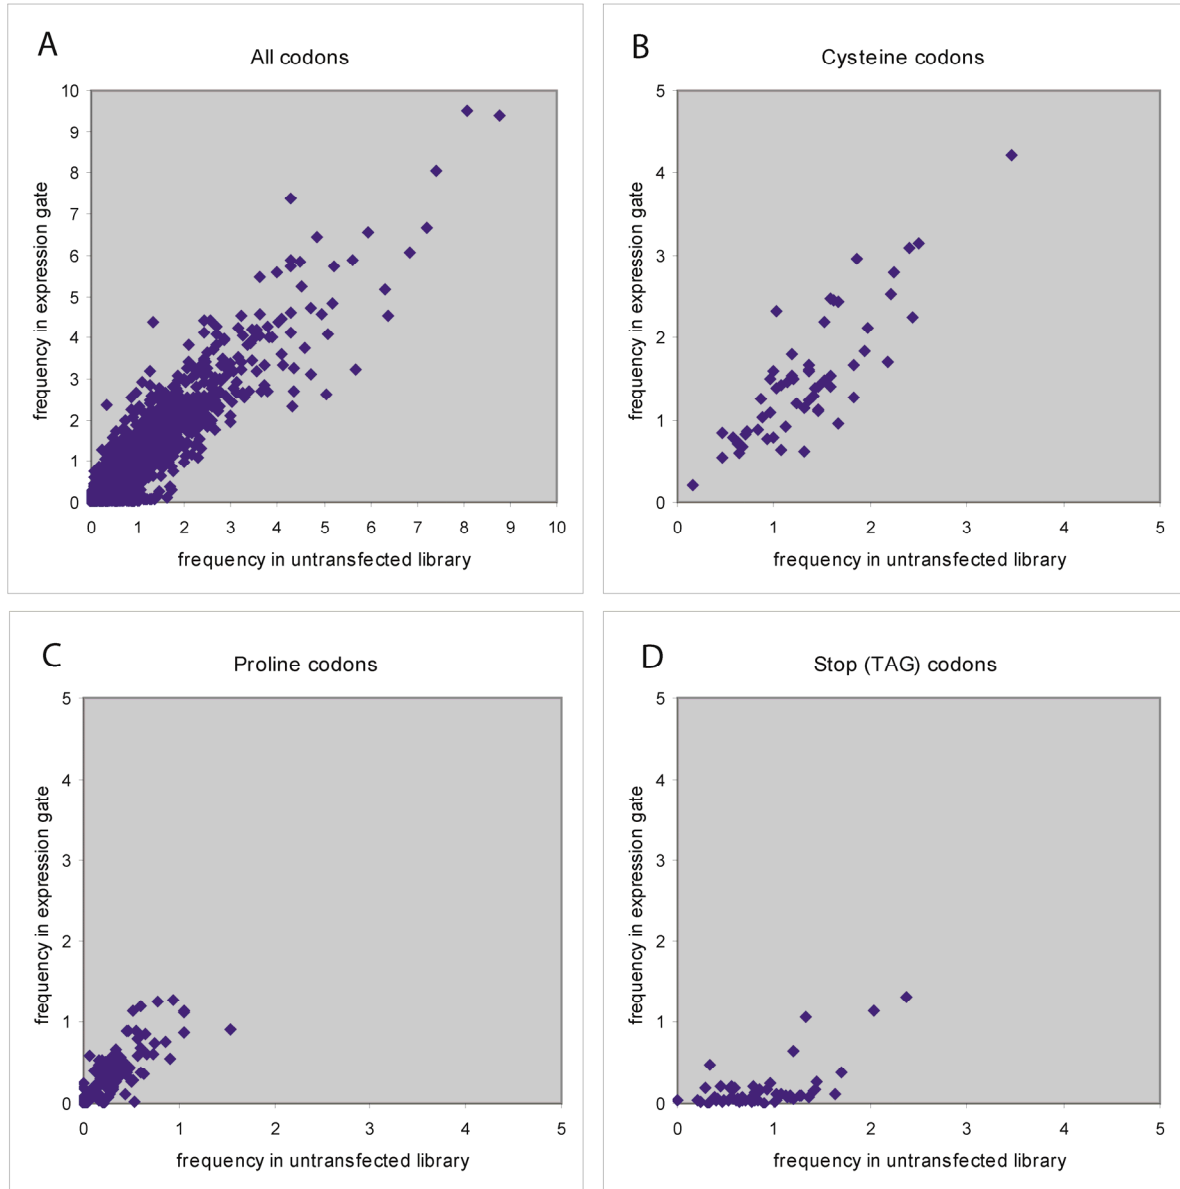

**Supplemental Figure S5.** Comparison of codon frequencies in the untransfected library vs. the expression gate. All values are in frequency per 1000. An aliquot of the untransfected library was pyrosequenced similarly to plasmids recovered from the FACS gates. Comparisons are shown for (A) all 1865 NNK codons (B) all cysteine codons (C) all proline codons and (D) nonsense (TAG) codons. In general, codons are found in the expression gate at similar frequencies to their appearance in the untransfected library, indicating no expression bias against particular substitution types, even unpaired cysteine residues or prolines which might be suspected to disrupt folding or structure. A clear bias is seen against nonsense codons in the expression gate, as expected.

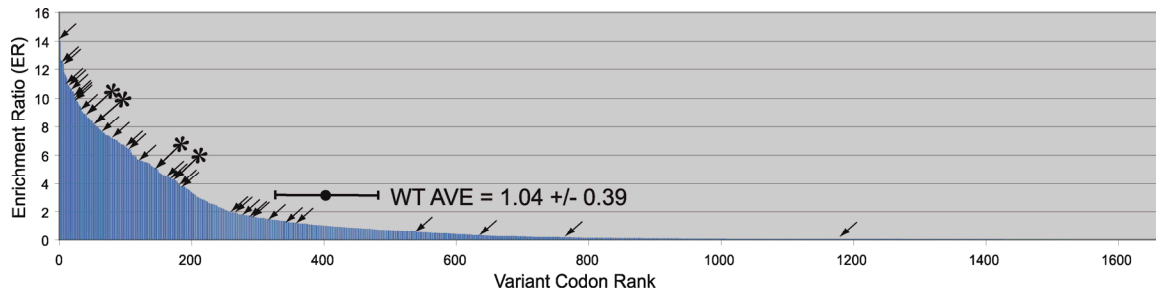

**Supplemental Figure S6.** 1662 hu225 codon variants ranked by enrichment ratio (ER). Average ER for the set of 71 synonymous wild type codons (1.04) is indicated. 37 codons for amino acid mutations previously found in higher affinity variants of Mab 225 CDRs are indicated. Arrows indicate variants from phage display affinity maturation<sup>10</sup>; arrows plus stars indicate variants identified from in silico design.<sup>9</sup>

| Supplemental Figure S7 |            |                   |             |            |                  |                     |                    |       |
|------------------------|------------|-------------------|-------------|------------|------------------|---------------------|--------------------|-------|
| position               | mutant     | ER(s)             | total reads | position   | mutant           | ER(s)               | total reads        |       |
| VH:N31                 | V          | 7.81, 5.98        | 1663        | VL:R24     | P                | 7.54, 7.37          | 732                |       |
|                        | I          | 5.53              | 265         |            | I                | 4.68                | 214                |       |
|                        | T          | 5.29              | 85          |            | D                | 4.44                | 219                |       |
|                        | D          | 4.59              | 162         |            | F                | 4.33                | 334                |       |
| VH:Y32                 | R          | 7.21, 6.61, 5.90  | 1278        | VL:A25     | C                | 11.60               | 2993               |       |
|                        | W          | 4.48              | 884         |            | V                | 10.70, 9.71         | 6364               |       |
| VH:G33                 | A          | 9.87, 9.15        | 1897        |            | L                | 10.63, 10.44, 9.46  | 5032               |       |
|                        | D          | 8.11              | 614         |            | F                | 9.81                | 2230               |       |
|                        | E          | 5.63, 6.66        | 1102        |            | M                | 9.76                | 1847               |       |
| VH:V34                 | N          | 8.13              | 516         |            | T                | 8.93, 8.55          | 1994               |       |
|                        | L          | 8.94, 6.98, 5.64  | 2276        | I          | 8.52             | 402                 |                    |       |
|                        | E          | 6.66              | 593         | Y          | 7.44             | 1450                |                    |       |
|                        | Q          | 4.12              | 116         | S          | 7.80, 7.25, 7.12 | 3398                |                    |       |
| VH:V50                 | Q          | 12.73             | 205         | VL:S26     | D                | 4.23                | 553                |       |
|                        | I          | 10.09             | 370         |            | T                | 5.08                | 629                |       |
|                        | L          | 10.87, 6.89, 6.46 | 2703        | VL:Q27     | F                | 10.87               | 1277               |       |
|                        | E          | 7.11              | 674         |            | Y                | 10.47               | 1562               |       |
| VH:I51                 | Q          | 8.34              | 798         |            | W                | 8.86                | 1978               |       |
|                        | C          | 7.96              | 846         |            | E                | 7.20                | 1215               |       |
|                        | G          | 7.67, 6.88        | 7378        | D          | 4.22             | 484                 |                    |       |
|                        | A          | 7.97, 5.69        | 3236        | VL:S28     | R                | 5.99, 5.57, 5.57    | 2986               |       |
|                        | S          | 7.36, 7.13, 5.66  | 3368        |            | VL:G30           | F                   | 12.55              | 1340  |
|                        | M          | 5.75              | 2023        | Y          |                  | 11.51               | 903                |       |
| VH:W52                 | G          | 8.62, 6.74        | 4460        | T          |                  | 10.61, 8.10         | 506                |       |
|                        | T          | 7.63, 5.45        | 320         | K          |                  | 8.63                | 365                |       |
|                        | I          | 4.70              | 249         | H          | 7.87             | 375                 |                    |       |
| VH:S53                 | N          | 7.40              | 148         | R          | 7.96, 7.34       | 2007                |                    |       |
|                        | T          | 6.50, 5.13        | 601         | M          | 7.57             | 450                 |                    |       |
|                        | Q          | 5.69              | 748         | C          | 6.75             | 1407                |                    |       |
| VH:G55                 | D          | 6.76              | 343         | Q          | 4.76             | 217                 |                    |       |
|                        | H          | 6.16              | 159         | W          | 4.75             | 4454                |                    |       |
|                        | E          | 5.43              | 730         | VL:T31     | V                | 8.11, 6.88          | 4629               |       |
|                        | A          | 5.48, 4.60        | 1373        |            | E                | 5.05                | 776                |       |
| VH:N56                 | G          | 5.19, 4.33        | 5329        |            | S                | 4.51, 4.26          | 714                |       |
|                        | A          | 4.30              | 520         |            | Q                | 4.19                | 473                |       |
|                        | VH:T57     | P                 | 8.74, 6.56  |            | 447              | VL:N32              | H                  | 12.63 |
| E                      |            | 7.02              | 645         | VL:N91     | L                |                     | 10.47, 10.37, 9.03 | 6885  |
| G                      |            | 7.09, 6.60        | 4721        |            | VL:N92           | R                   | 11.01, 9.58, 9.42  | 4550  |
| D                      |            | 5.62              | 558         |            |                  | L                   | 12.53, 9.10, 5.45  | 3665  |
| A                      |            | 5.52              | 712         |            |                  | K                   | 7.05               | 719   |
| S                      |            | 5.97, 5.37, 4.34  | 906         |            | M                | 8.92                | 889                |       |
| W                      |            | 4.57              | 1464        | VL:N93     | E                | 10.05               | 1266               |       |
| VH:Y59                 | H          | 8.65              | 127         |            | A                | 8.84, 8.20          | 2660               |       |
|                        | E          | 7.76              | 1971        |            | D                | 7.58                | 801                |       |
|                        | W          | 6.73              | 2276        |            | T                | 4.66, 4.49          | 709                |       |
|                        | S          | 7.56, 5.91, 5.50  | 3125        | VL:T96     | L                | 6.20, 5.17, 4.27    | 511                |       |
|                        | P          | 7.07, 5.08        | 327         |            | VL:T97           | C                   | 14.00              | 1173  |
|                        | Q          | 5.95              | 776         | S          |                  | 12.44, 11.80, 10.80 | 3689               |       |
|                        | A          | 6.46, 4.98        | 2008        | H          |                  | 11.67               | 718                |       |
|                        | C          | 5.62              | 1420        | L          |                  | 11.36, 9.46, 5.13   | 3645               |       |
|                        | F          | 5.24              | 765         | E          |                  | 8.39                | 1441               |       |
|                        | M          | 4.60              | 1002        | A          |                  | 8.49, 6.76          | 2627               |       |
| G                      | 4.62, 4.48 | 3010              | I           | 7.37       |                  | 817                 |                    |       |
| N                      | 4.55       | 672               | N           | 7.20       |                  | 393                 |                    |       |
| D                      | 4.17       | 946               | G           | 7.32, 6.45 |                  | 3812                |                    |       |
| VH:N60                 | D          | 8.40              | 638         | Q          |                  | 6.79                | 762                |       |
| VH:F63                 | V          | 5.65, 5.22        | 2254        | K          | 6.41             | 419                 |                    |       |
|                        | VH:T64     | E                 | 5.53        | 1356       | D                | 5.98                | 1116               |       |
| VH:T97                 |            | D                 | 6.40        | 981        | Y                | 4.42                | 384                |       |
|                        | S          | 5.04              | 608         | VH:Y98     | W                | 4.82                | 506                |       |
| VH:Y98                 | W          | 4.82              | 506         |            | VH:F100c         | Y                   | 14.19              | 166   |
|                        | Y          | 14.19             | 166         |            |                  |                     |                    |       |



**Supplemental Figure S7.** Selection criteria for 67 higher affinity candidates for verification. The set of 179 codon variants with ER greater than 4 were used to identify 31 positions containing one or more candidate mutations. In order to look at as wide a range of positions as possible, within each position the top 1 to 4 candidates with highest ERs were selected for confirmation (rather than select candidates strictly by ER within the overall set). As a first strategy, these 49 variants (shown in blue) were pursued by gene synthesis of the individual variants. As a second parallel strategy (to reduce gene synthesis costs) at 6 of the ‘hotspot’ positions with multiple potential candidates (VH:I51, VH:T57, VH:Y59, VL:A25, VL:G30, and VL:T97) 96 individual clones from the corresponding positional sub library were sequenced to identify as many clones of interest as possible. The 18 variants thus identified (shown in grey) were also selected for verification, although they were not always the highest remaining ER candidates within their respective position. A few exceptions to the highest ER criteria for the first strategy were made as follows. At positions VH:I51, VL:A25, and VL:T97, Cys substitutions were skipped over in favor of other high ER variants due to a concern about potential problems from unpaired cysteines in the CDRs (although VL:A25C was nonetheless identified from the second strategy). At position VH:V50, Ile was passed over in favor of the conservative variant Leu, based on multiple codons and higher overall number of reads for Leu. At position VH:S53, Asn was passed over in favor of the conservative variant Gln for verification, due to the relatively low number of reads for Asn (148). At position VH:T57, identification of Asp from strategy 2 lead to dropping the conservative substitution Glu from the strategy 1 pool. At position VL:Q27, Tyr was selected for verification instead of the conservative substitution Phe, as they had nearly identical ERs and tyrosine residues are more frequently found in antibody CDRs. The His substitution at VL:N32 was not pursued as preliminary experiments showed no benefit over wild type, and closer inspection of the 454 sequencing data showed that the enriched His codon was found in only one of direction sequencing reads, suggesting some sort of sequencing artifact. No variants were selected for confirmation at positions VL:S26 and VL:T96 due to limitations in the number of variants that could be pursued, and because the best variants at these positions barely passed the 5.0 ER level.

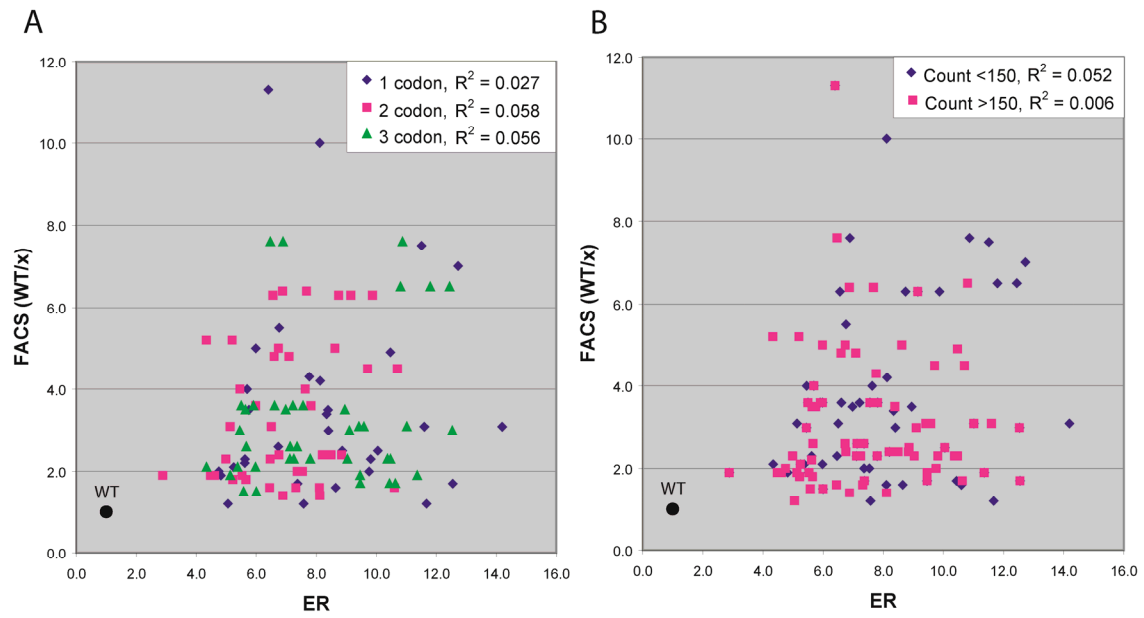

**Supplemental Figure S8.** FACS based affinity and enrichment ratio relationship. (A) FACS binding of the variant over wild type versus ER where either one, two, or three codons encode for the same variant. (B) FACS versus ER where expression counts for a given codon have more or less than 150 sequences. Location of the average ER for 71 synonymous wild type codons is indicated.

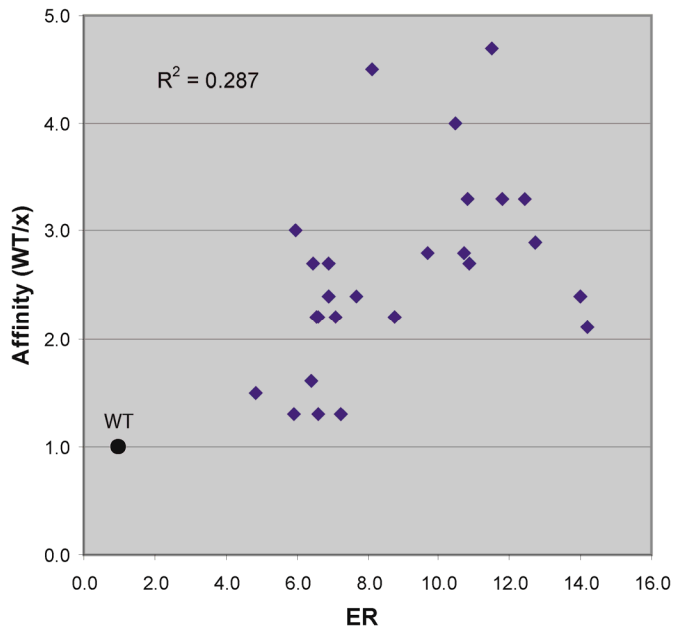

**Supplemental Figure S9.** BIAcore based affinity and enrichment ratio relationship. BIAcore binding affinity over wild type versus ER. Location of the average ER for 71 synonymous wild type codons is indicated.

TABLE S1

Number of occurrences of 1806 possible NNK variant codons in the expression gate. Grey shade indicates codons with 10 or fewer occurrences; black indicates wild type codon.

| position | WT codon | AAG | AAT | ACG | ACT | AGG | AGT | ATG | ATT | CAG | CAT | CCG | CCT | CGG | CGT | CTG | CTT | GAG | GAT | GCG | GCT  | GGG  | GGT  | GTG  | GTT  | TAT | TCG | TCT | TGG | TGT  | TTG | TTT |     |     |
|----------|----------|-----|-----|-----|-----|-----|-----|-----|-----|-----|-----|-----|-----|-----|-----|-----|-----|-----|-----|-----|------|------|------|------|------|-----|-----|-----|-----|------|-----|-----|-----|-----|
| VH:N31   | AAC      | 10  | 61  | 15  | 18  | 49  | 26  | 38  | 45  | 1   | 13  | 14  | 24  | 56  | 49  | 55  | 54  | 84  | 32  | 65  | 55   | 176  | 125  | 121  | 112  | 32  | 81  | 41  | 123 | 135  | 182 | 119 |     |     |
| VH:Y32   | TAC      | 46  | 33  | 45  | 30  | 77  | 22  | 56  | 25  | 46  | 4   | 8   | 19  | 59  | 53  | 63  | 55  | 66  | 35  | 70  | 86   | 203  | 87   | 140  | 79   | 244 | 61  | 31  | 178 | 122  | 162 | 132 |     |     |
| VH:G33   | GGC      | 46  | 37  | 42  | 12  | 65  | 61  | 77  | 109 | 65  | 53  | 29  | 22  | 96  | 102 | 125 | 94  | 85  | 75  | 108 | 94   | 156  | 504  | 284  | 231  | 71  | 173 | 146 | 251 | 132  | 300 | 254 |     |     |
| VH:V34   | GTC      | 23  | 63  | 19  | 28  | 84  | 165 | 66  | 141 | 25  | 75  | 83  | 24  | 33  | 60  | 186 | 86  | 139 | 59  | 74  | 173  | 480  | 198  | 531  | 244  | 32  | 303 | 248 | 418 | 82   | 415 |     |     |     |
| VH:H35   | CAC      | 32  | 54  | 40  | 21  | 101 | 33  | 74  | 117 | 79  | 128 | 36  | 20  | 150 | 104 | 100 | 76  | 51  | 93  | 131 | 95   | 321  | 215  | 341  | 232  | 96  | 146 | 96  | 210 | 253  | 222 | 270 |     |     |
| VH:V50   | GTG      | 14  | 22  | 33  | 24  | 85  | 62  | 279 | 38  | 17  | 15  | 29  | 31  | 60  | 67  | 68  | 44  | 94  | 50  | 210 | 83   | 283  | 274  | 285  | 88   | 63  | 74  | 224 | 193 | 268  | 141 |     |     |     |
| VH:I51   | ATA      | 95  | 44  | 108 | 63  | 151 | 131 | 338 | 125 | 97  | 89  | 96  | 18  | 287 | 190 | 188 | 228 | 210 | 110 | 376 | 127  | 652  | 371  | 643  | 327  | 61  | 229 | 146 | 400 | 107  | 367 | 112 |     |     |
| VH:W52   | TGG      | 42  | 21  | 33  | 12  | 88  | 80  | 94  | 49  | 60  | 18  | 72  | 5   | 228 | 83  | 43  | 37  | 145 | 32  | 189 | 76   | 398  | 205  | 296  | 153  | 61  | 191 | 44  | 228 | 371  | 163 |     |     |     |
| VH:S53   | TCA      | 18  | 20  | 58  | 43  | 136 | 72  | 127 | 105 | 126 | 60  | 206 | 29  | 252 | 103 | 185 | 124 | 96  | 77  | 205 | 73   | 210  | 276  | 405  | 234  | 101 | 178 | 112 | 334 | 242  | 364 | 219 |     |     |
| VH:G54   | GGC      | 14  | 21  | 35  | 64  | 86  | 107 | 109 | 58  | 82  | 32  | 61  | 32  | 195 | 122 | 230 | 115 | 89  | 82  | 275 | 201  | 468  | 579  | 535  | 332  | 58  | 228 | 150 | 426 | 361  | 409 | 374 |     |     |
| VH:G55   | GGA      | 56  | 25  | 32  | 39  | 118 | 133 | 85  | 106 | 95  | 25  | 52  | 71  | 161 | 146 | 142 | 131 | 128 | 50  | 114 | 144  | 544  | 480  | 376  | 247  | 110 | 99  | 130 | 458 | 407  | 332 | 239 |     |     |
| VH:N56   | AAC      | 30  | 180 | 101 | 49  | 147 | 163 | 98  | 108 | 92  | 68  | 145 | 59  | 242 | 283 | 220 | 177 | 210 | 186 | 255 | 110  | 647  | 372  | 385  | 438  | 115 | 166 | 109 | 538 | 497  | 463 | 226 |     |     |
| VH:T57   | ACA      | 29  | 48  | 83  | 99  | 118 | 76  | 134 | 96  | 96  | 19  | 42  | 13  | 101 | 85  | 147 | 88  | 91  | 95  | 123 | 115  | 372  | 307  | 456  | 281  | 60  | 71  | 23  | 295 | 155  | 237 | 142 |     |     |
| VH:D58   | GAC      | 214 | 122 | 128 | 127 | 280 | 195 | 167 | 66  | 141 | 76  | 56  | 42  | 119 | 71  | 110 | 37  | 273 | 252 | 172 | 93   | 332  | 286  | 272  | 130  | 114 | 92  | 101 | 292 | 201  | 219 | 140 |     |     |
| VH:Y59   | TAC      | 164 | 136 | 89  | 111 | 222 | 220 | 201 | 169 | 126 | 15  | 33  | 17  | 140 | 104 | 125 | 70  | 255 | 205 | 257 | 97   | 385  | 226  | 279  | 275  | 363 | 147 | 116 | 333 | 242  | 290 | 138 |     |     |
| VH:N60   | AAC      | 160 | 148 | 64  | 76  | 151 | 105 | 85  | 81  | 85  | 58  | 85  | 24  | 72  | 66  | 52  | 71  | 124 | 77  | 130 | 74   | 219  | 173  | 105  | 99   | 79  | 75  | 61  | 229 | 121  | 119 | 76  |     |     |
| VH:T61   | ACT      | 149 | 133 | 188 | 183 | 354 | 202 | 147 | 143 | 130 | 63  | 20  | 21  | 229 | 82  | 124 | 21  | 193 | 104 | 171 | 130  | 477  | 199  | 258  | 105  | 122 | 83  | 48  | 301 | 133  | 147 | 71  |     |     |
| VH:P62   | CCT      | 199 | 165 | 115 | 183 | 281 | 205 | 191 | 162 | 168 | 231 | 203 | 21  | 197 | 188 | 107 | 194 | 220 | 130 | 115 | 118  | 513  | 274  | 97   | 178  | 121 | 163 | 127 | 303 | 176  | 256 | 102 |     |     |
| VH:F63   | TTT      | 159 | 56  | 94  | 56  | 209 | 105 | 172 | 129 | 68  | 45  | 68  | 37  | 143 | 98  | 77  | 88  | 176 | 105 | 174 | 89   | 253  | 238  | 175  | 221  | 152 | 103 | 123 | 209 | 273  | 213 | 213 |     |     |
| VH:T64   | ACC      | 124 | 114 | 159 | 184 | 253 | 153 | 184 | 87  | 98  | 58  | 59  | 86  | 168 | 82  | 86  | 50  | 234 | 101 | 204 | 64   | 307  | 161  | 256  | 17   | 97  | 123 | 34  | 232 | 86   | 99  | 39  |     |     |
| VH:S65   | TCC      | 223 | 120 | 110 | 40  | 283 | 147 | 174 | 127 | 167 | 90  | 99  | 12  | 191 | 79  | 121 | 48  | 214 | 117 | 188 | 84   | 489  | 212  | 249  | 137  | 86  | 110 | 105 | 242 | 135  | 197 | 92  |     |     |
| VH:A95   | GCA      | 5   | 11  | 9   | 2   | 37  | 7   | 7   | 2   | 11  |     |     |     |     |     | 11  |     | 49  | 34  | 24  | 1    | 415  | 212  | 131  | 101  | 35  |     |     | 376 | 219  | 217 | 71  |     |     |
| VH:L96   | TTG      | 12  | 10  | 10  |     | 164 | 56  | 64  | 22  |     |     |     |     |     |     | 13  |     | 32  | 61  |     |      | 714  | 542  | 323  | 185  | 51  | 96  | 2   | 543 | 258  |     | 317 |     |     |
| VH:T97   | ACC      | 42  | 33  | 46  | 85  | 346 | 109 | 256 | 127 |     |     |     | 13  | 3   | 6   |     |     | 214 | 144 | 7   |      | 1017 | 629  | 1001 | 491  | 94  | 35  | 2   | 664 | 458  | 505 | 196 |     |     |
| VH:Y98   | TAT      | 437 | 610 | 246 | 268 | 259 | 241 | 203 | 401 | 133 | 430 | 134 | 173 | 86  | 120 | 130 | 118 | 134 | 279 | 124 | 167  | 89   | 72   | 147  | 118  |     | 137 | 208 | 94  | 380  | 150 | 135 |     |     |
| VH:Y99   | TAC      | 15  | 32  | 33  | 2   | 179 | 90  | 50  | 58  |     |     |     |     | 6   | 2   | 2   |     | 63  | 14  | 5   |      | 542  | 251  | 407  | 296  | 175 | 19  | 3   | 658 | 247  | 342 | 104 |     |     |
| VH:D100  | GAC      | 3   | 17  | 3   | 33  | 162 | 59  | 54  | 9   |     |     |     |     |     | 1   |     |     | 37  | 96  | 7   |      | 631  | 271  | 378  | 143  | 34  | 2   |     | 336 | 174  | 206 | 41  |     |     |
| VH:Y100a | TAC      | 67  | 4   | 33  | 1   | 157 | 95  | 82  | 98  |     |     |     |     | 1   |     | 1   |     | 158 | 64  | 4   | 3    | 640  | 400  | 397  | 303  | 149 | 5   | 10  | 384 | 161  | 416 | 183 |     |     |
| VH:E100b | GAG      | 527 | 18  | 1   |     | 452 | 304 | 305 | 157 | 8   |     |     |     | 4   | 2   | 3   |     |     |     |     |      | 83   | 3    |      | 1246 | 911 | 939 | 652 | 53  |      | 888 | 488 | 709 | 168 |
| VH:F100c | TTC      | 55  | 14  |     |     | 211 | 99  | 137 | 115 |     |     |     |     | 3   | 1   |     |     | 106 | 44  |     |      | 469  | 352  | 503  | 304  | 12  | 51  |     | 327 | 31   | 416 | 348 |     |     |
| VH:A101  | GCT      |     | 9   |     | 415 | 161 | 64  | 59  | 22  |     |     |     | 1   | 1   | 7   | 1   | 33  | 66  | 491 | 18  |      | 583  | 452  | 292  | 353  | 39  |     | 79  | 504 | 171  | 295 | 133 |     |     |
| VH:Y102  | TAC      | 55  | 41  | 35  | 4   | 224 | 229 | 119 | 51  |     |     |     |     | 2   | 3   |     |     | 184 | 44  | 5   |      | 6    | 1472 | 815  | 209  | 268 | 130 | 29  |     | 1456 | 652 | 677 | 314 |     |
| VL:R24   | CGG      | 48  | 22  | 76  | 5   | 726 | 20  | 120 | 44  | 410 | 46  | 64  | 38  | 300 | 409 | 60  | 235 | 47  | 120 | 36  | 398  | 214  | 385  | 55   | 31   | 82  | 46  | 456 | 98  | 138  | 73  |     |     |     |
| VL:A25   | GCC      | 87  | 50  | 130 | 113 | 247 | 146 | 204 | 50  | 157 | 40  | 142 | 137 | 353 | 199 | 132 | 85  | 313 | 138 | 281 | 327  | 704  | 375  | 361  | 312  | 203 | 184 | 149 | 559 | 283  | 312 | 245 |     |     |
| VL:S26   | AGT      | 85  | 256 | 121 | 17  | 331 | 156 | 110 | 91  | 48  | 102 | 37  | 152 | 64  | 172 | 76  | 182 | 123 | 224 | 73  | 517  | 295  | 391  | 247  | 64   | 232 | 194 | 574 | 381 | 246  | 145 |     |     |     |
| VL:Q27   | CAG      | 481 | 91  | 132 | 100 | 222 | 196 | 96  | 125 | 480 | 86  | 176 | 343 | 203 | 119 | 168 | 175 | 108 | 247 | 204 | 125  | 113  | 403  | 328  | 162  | 141 | 123 | 238 | 191 | 237  | 128 |     |     |     |
| VL:S28   | AGC      | 46  | 92  | 104 | 57  | 191 | 249 | 126 | 107 | 119 | 118 | 123 | 113 | 201 | 133 | 110 | 183 | 200 | 63  | 288 | 156  | 363  | 323  | 264  | 311  | 106 | 93  | 137 | 55  | 215  | 257 | 206 |     |     |
| VL:I29   | ATT      | 51  | 140 | 56  | 74  | 293 | 194 | 121 | 121 | 72  | 46  | 78  | 28  | 287 | 120 | 102 | 59  | 76  | 45  | 139 | 96   | 360  | 361  | 244  | 199  | 79  | 73  | 37  | 357 | 216  | 270 | 168 |     |     |
| VL:G30   | GGG      | 45  | 33  | 38  | 22  | 681 | 107 | 62  | 73  | 44  | 50  | 50  | 37  | 155 | 118 | 84  | 87  | 690 | 170 | 248 | 119  | 900  | 860  | 391  | 86   | 50  | 43  | 905 | 214 | 226  | 118 |     |     |     |
| VL:T31   | ACT      | 127 | 32  | 59  |     | 130 | 87  | 97  | 192 | 106 | 65  | 46  | 45  | 207 | 95  | 85  | 54  | 150 | 146 | 185 | 155  | 225  | 218  | 357  | 280  | 100 | 164 | 68  | 293 | 248  | 287 | 218 |     |     |
| VL:N32   | AAT      | 129 |     | 60  | 50  | 159 | 235 | 151 | 89  | 29  | 38  | 90  | 62  | 166 | 163 | 74  | 135 | 105 | 116 | 22  | 51   | 300  | 298  | 273  | 285  | 113 | 106 | 81  | 358 | 237  | 300 | 254 |     |     |
| VL:I33   | ATC      | 116 | 180 | 87  | 51  | 178 | 185 | 170 | 160 | 130 | 66  | 76  | 56  | 293 | 308 | 176 | 105 | 213 | 137 | 139 | 32   | 615  | 295  | 429  | 173  | 124 | 238 | 109 | 503 | 359  | 493 | 291 |     |     |
| VL:H34   | CAC      | 139 | 126 | 81  | 59  | 203 | 273 | 219 | 123 | 105 | 194 | 89  | 40  | 208 | 188 | 279 | 151 | 287 | 147 | 232 | 73   | 353  | 325  | 416  | 324  | 79  | 165 | 162 | 407 | 258  | 482 | 282 |     |     |
| VL:Y50   | TAC      | 78  | 111 | 42  | 54  | 138 | 198 | 143 | 154 | 8   | 19  | 18  | 31  | 78  | 90  | 35  | 38  | 142 | 105 | 66  | 134  | 394  | 505  | 343  | 337  | 199 | 98  | 92  | 361 | 174  | 256 | 262 |     |     |
| VL:A51   | GCG      | 87  | 96  | 670 | 90  | 271 | 220 | 100 | 211 | 167 | 98  | 67  | 78  | 383 | 224 | 192 | 96  | 336 | 166 |     | 1020 | 837  | 523  | 629  | 400  | 221 | 185 | 131 | 493 | 428  | 366 | 425 |     |     |
| VL:S52   | AGC      | 63  | 48  | 40  | 19  | 227 | 369 | 138 | 100 | 18  | 32  | 23  | 5   | 134 | 68  | 120 | 19  | 77  | 80  | 118 | 96   | 355  | 272  | 304  | 150  | 82  | 63  | 47  | 409 | 196  | 316 | 159 |     |     |
| VL:E53   | GAA      | 109 | 48  | 87  | 19  | 172 | 143 | 200 | 79  | 119 | 23  | 93  | 82  | 275 | 128 | 153 | 191 | 251 | 124 | 81  | 103  | 738  | 336  | 605  | 239  | 174 | 140 | 72  | 355 | 136  | 336 | 115 |     |     |
| VL:S54   | TCA      | 82  | 63  | 73  | 38  | 171 | 110 | 172 | 170 | 72  | 93  | 42  | 7   | 195 | 117 | 98  | 49  | 151 | 134 | 241 | 99   | 480  | 336  | 527  | 286  | 121 | 131 | 126 | 286 | 197  | 448 | 183 |     |     |
| VL:I55   | ATT      | 350 | 85  | 137 | 88  | 792 | 494 | 318 |     | 172 |     |     |     |     |     |     |     |     |     |     |      |      |      |      |      |     |     |     |     |      |     |     |     |     |

TABLE S2

Number of occurrences of 1806 possible NNK variant codons in the binding gate. Grey shade indicates codons with 10 or fewer occurrences; black indicates wild type codon.

| position | WT codon | AAG | AAT | ACG | ACT | AGG    | AGT  | ATG  | ATT | CAG | CAT | CCG | CCT | CGG  | CGT | CTG  | CTT  | GAG  | GAT | GCG  | GCT | GGG  | GGT  | GTG  | GTT  | TAT  | TCG  | TCT | TGG  | TGT  | TTG  | TTT  |     |    |    |      |
|----------|----------|-----|-----|-----|-----|--------|------|------|-----|-----|-----|-----|-----|------|-----|------|------|------|-----|------|-----|------|------|------|------|------|------|-----|------|------|------|------|-----|----|----|------|
| VH:N31   | AAC      |     | 56  | 70  | 56  | 7      | 13   | 20   | 220 | 1   | 10  |     |     | 12   | 2   | 7    | 23   | 10   | 130 | 33   | 26  | 28   | 9    | 837  | 593  | 10   | 19   | 26  | 81   | 13   | 14   | 49   |     |    |    |      |
| VH:Y32   | TAC      | 1   | 21  | 6   | 3   | 402    |      | 151  | 3   | 2   |     | 2   |     | 377  | 310 | 4    | 4    |      | 3   | 5    | 2   | 9    | 1    | 11   | 3    | 207  | 11   | 2   | 706  | 5    | 14   | 9    |     |    |    |      |
| VH:G33   | GCC      |     | 2   |     | 1   | 5      | 5    | 2    | 4   |     |     |     | 1   | 1    | 8   | 2    | 424  | 539  | 874 | 821  | 271 | 393  | 6    | 4    | 2    | 3    | 8    | 10  | 1    | 13   | 7    |      |     |    |    |      |
| VH:V34   | GTC      | 51  | 453 | 1   | 17  | 2      | 284  | 107  | 498 | 91  |     |     |     | 7    | 371 | 928  | 507  | 11   | 33  | 32   | 13  | 40   | 268  | 651  | 3    | 30   | 313  | 7   | 1272 | 649  | 21   |      |     |    |    |      |
| VH:H35   | CAC      |     | 7   | 1   |     |        |      | 4    | 16  | 155 | 2   | 5   | 7   | 2    | 3   | 1    | 5    | 6    | 6   | 3    | 17  | 12   | 10   | 8    | 7    | 12   | 6    | 12  | 6    | 17   | 7    |      |     |    |    |      |
| VH:V50   | GTG      | 10  | 72  |     | 1   | 7      | 2    | 678  | 332 | 188 |     | 1   |     |      | 1   | 406  | 415  | 580  |     | 44   | 8   | 12   | 13   | 10   | 230  | 2    | 2    | 12  | 64   | 1502 | 5    |      |     |    |    |      |
| VH:I51   | ATA      | 3   | 129 | 14  | 12  | 23     | 836  | 1685 | 181 | 701 | 90  | 1   | 2   | 62   | 43  | 361  | 326  | 448  | 349 | 1855 | 878 | 3887 | 2468 | 709  | 409  | 45   | 1124 | 902 | 66   | 739  | 640  | 15   |     |    |    |      |
| VH:W52   | TGG      | 1   | 48  | 218 | 57  | 12     | 9    | 19   | 200 | 11  | 1   | 1   |     | 49   | 4   | 12   | 6    | 5    | 1   | 1    | 3   | 2325 | 1532 | 140  | 112  | 8    | 7    | 410 | 17   | 103  | 55   |      |     |    |    |      |
| VH:S53   | TCA      |     | 128 | 258 | 242 | 4      | 44   | 4    | 1   | 622 | 9   | 10  |     | 22   | 2   | 7    | 1    | 9    | 58  | 7    | 5   | 10   | 17   | 86   | 63   | 9    | 251  | 109 | 25   | 5    | 18   | 17   |     |    |    |      |
| VH:G54   | GGC      | 2   |     |     | 2   | 21     | 1    | 5    | 4   |     |     |     |     | 2    | 17  | 1    | 19   | 5    | 10  | 9    | 6   |      |      | 87   | 39   | 590  | 598  | 26  | 63   | 9    | 4    | 9    | 178 | 16 | 20 | 1078 |
| VH:G55   | GGA      | 7   |     | 15  | 26  | 6      | 400  | 79   |     | 59  | 134 | 2   | 4   | 30   | 24  | 53   | 19   | 602  | 293 | 541  | 574 | 668  | 672  | 10   | 17   | 133  | 287  | 422 | 78   | 87   | 31   | 217  |     |    |    |      |
| VH:N56   | AAC      | 3   | 117 | 112 | 2   | 74     | 237  | 10   | 4   |     |     |     |     | 11   | 6   | 1    | 74   | 20   | 6   | 8    | 6   | 5    | 838  | 410  | 2913 | 1397 | 11   | 16  | 4    | 212  | 112  | 51   | 30  | 12 | 13 |      |
| VH:T57   | ACA      | 5   | 59  | 113 | 77  | 8      | 286  | 75   | 19  | 94  | 45  | 318 | 74  | 10   | 12  | 9    | 9    | 554  | 463 | 589  | 287 | 2286 | 1756 | 177  | 125  | 60   | 331  | 119 | 1169 | 32   | 41   | 223  |     |    |    |      |
| VH:D58   | GAC      | 7   | 4   | 3   | 103 | 8      | 1    | 14   | 2   | 47  |     |     |     | 1    | 9   | 1    | 5    |      | 14  | 206  | 10  | 5    | 48   | 16   | 7    | 4    | 1    | 5   |      | 8    |      | 3    | 1   |    |    |      |
| VH:Y59   | TAC      | 362 | 536 | 275 | 197 | 155    | 1126 | 801  | 20  | 650 | 112 | 202 | 75  | 89   | 81  | 273  | 173  | 1716 | 741 | 1111 | 543 | 1494 | 905  | 178  | 173  | 398  | 963  | 553 | 1943 | 1178 | 811  | 627  |     |    |    |      |
| VH:N60   | AAC      | 7   | 137 | 82  | 52  | 10     | 90   | 10   | 81  | 13  | 1   | 3   | 5   | 7    |     | 13   | 6    | 2    | 561 | 106  | 55  | 26   | 43   | 46   | 37   | 24   | 56   | 17  | 764  | 10   | 8    | 39   |     |    |    |      |
| VH:T61   | ACT      | 37  | 51  | 151 | 110 | 81     | 319  | 98   | 52  | 118 |     |     |     | 1    | 44  | 26   | 72   | 15   | 321 | 202  | 184 | 220  | 82   | 27   | 66   | 19   | 8    | 127 | 96   | 26   | 15   | 150  | 52  |    |    |      |
| VH:P62   | CCT      | 10  | 8   | 3   | 18  | 10     | 5    | 14   | 17  | 17  | 6   | 251 | 10  | 11   | 8   | 19   | 118  | 12   | 14  | 7    | 10  | 67   | 16   | 16   | 3    | 7    | 6    | 45  | 15   | 8    | 15   | 21   |     |    |    |      |
| VH:F63   | TTT      | 27  | 2   | 63  | 40  | 46     | 41   | 235  | 194 | 18  | 12  | 11  | 4   | 22   | 20  | 133  | 154  | 27   | 14  | 161  | 164 | 90   | 83   | 858  | 1000 | 52   | 19   | 67  | 557  | 20   | 334  | 103  |     |    |    |      |
| VH:T64   | ACC      | 17  | 192 | 215 | 200 | 44     | 250  | 337  | 104 | 58  | 15  | 12  | 52  | 16   | 11  | 77   | 62   | 1122 | 332 | 298  | 99  | 328  | 144  | 211  | 32   | 195  | 119  | 46  | 185  | 3    | 91   | 23   |     |    |    |      |
| VH:S65   | TCC      | 241 | 164 | 114 | 100 | 331    | 172  | 240  | 107 | 192 | 82  | 47  | 26  | 287  | 95  | 182  | 57   | 320  | 185 | 223  | 97  | 643  | 273  | 202  | 168  | 197  | 150  | 136 | 352  | 31   | 303  | 261  |     |    |    |      |
| VH:A95   | GCA      | 3   |     |     |     |        |      |      |     |     | 23  |     |     |      |     |      |      |      |     |      | 18  | 2    | 7    | 4    | 11   | 4    | 1    |     | 8    | 20   | 8    | 1    |     |    |    |      |
| VH:L96   | TTG      | 1   |     |     |     | 5      | 4    | 14   | 2   |     |     |     |     |      |     | 14   |      |      |     | 218  |     |      | 13   | 17   | 14   | 5    | 6    | 25  |      | 18   | 18   | 10   | 12  |    |    |      |
| VH:T97   | ACC      | 7   | 2   | 9   | 78  | 10     | 499  | 10   | 6   |     |     |     | 23  |      |     |      |      | 466  | 837 |      |     | 47   | 23   | 47   | 21   | 15   | 2    |     | 33   | 31   | 32   | 7    |     |    |    |      |
| VH:Y98   | TAT      | 11  | 15  | 11  | 13  | 16     | 8    | 10   | 40  | 7   | 43  | 7   | 4   | 6    | 8   | 7    | 12   | 1    | 15  | 2    | 14  |      |      | 6    | 3    | 10   | 1    | 8   | 412  | 39   | 14   | 15   |     |    |    |      |
| VH:Y99   | TAC      |     |     | 24  |     | 1      |      | 1    |     |     |     |     |     |      |     |      |      | 1    | 5   |      |     |      |      | 15   | 14   | 14   | 15   | 166 | 1    |      | 26   | 15   | 12  | 2  |    |      |
| VH:D100  | GAC      | 7   |     |     | 24  | 7      | 2    | 2    |     |     |     |     |     |      |     |      |      |      |     | 99   |     |      | 24   | 6    | 3    | 9    |      |     | 6    | 6    | 10   | 7    |     |    |    |      |
| VH:Y100a | TAC      |     |     | 25  |     | 5      | 3    | 3    | 2   |     |     |     |     |      |     |      |      |      |     | 4    |     |      | 17   | 20   | 9    | 5    | 137  | 4   |      | 170  | 4    | 60   | 8   |    |    |      |
| VH:E100b | GAG      | 84  | 5   |     |     | 14     | 38   | 17   | 2   |     |     |     |     |      |     |      |      | 10   | 41  | 4    |     |      | 75   | 45   | 22   | 17   |      |     | 15   | 13   | 33   | 1    |     |    |    |      |
| VH:F100c | TTT      | 1   |     |     |     | 2      | 3    | 1    | 1   |     |     |     |     |      |     |      |      |      |     |      | 1   | 2    |      | 12   | 18   | 18   | 11   | 154 | 25   |      | 203  | 18   | 345 |    |    |      |
| VH:A101  | GCT      |     | 20  |     | 122 | 26     | 24   | 12   | 1   |     |     |     |     |      |     |      |      |      |     |      |     |      |      | 36   | 21   | 28   | 93   | 24  | 1    | 33   | 25   | 106  | 9   | 16 |    |      |
| VH:Y102  | TAC      |     |     | 18  |     | 7      | 14   | 8    | 5   |     |     |     |     | 1    |     |      |      |      |     | 1    |     |      | 41   | 31   | 48   | 21   | 113  | 1   |      | 53   | 29   | 18   | 267 |    |    |      |
| VL:R24   | CGG      | 42  | 18  | 66  | 9   | 606    | 24   | 167  | 170 | 449 | 4   | 399 | 231 | 10   | 168 | 613  | 96   | 476  | 172 | 155  | 76  | 386  | 336  | 876  | 145  | 95   | 57   | 9   | 973  | 178  | 412  | 261  |     |    |    |      |
| VL:A25   | GCC      | 1   | 11  | 918 | 833 | 16     | 858  | 1643 | 352 | 3   | 52  | 865 | 623 | 11   | 21  | 1031 | 733  | 24   | 2   | 203  | 159 | 49   | 64   | 3190 | 2501 | 1247 | 1102 | 959 | 400  | 2710 | 2739 | 1985 |     |    |    |      |
| VL:S26   | AGT      | 17  | 366 | 508 | 37  | 39     | 10   | 4    | 2   | 18  | 1   | 16  |     | 26   | 3   | 4    | 4    | 57   | 430 | 21   | 2   | 56   | 170  | 12   | 20   | 5    | 155  | 80  | 27   | 34   | 26   | 6    |     |    |    |      |
| VL:Q27   | CAG      | 17  | 26  | 66  | 73  | 6      | 39   | 21   | 9   | 10  | 763 | 12  | 11  | 26   | 10  | 60   | 9    | 1040 | 376 | 74   | 41  | 11   | 3    | 208  | 325  | 1400 | 55   | 17  | 1740 | 10   | 6    | 1149 |     |    |    |      |
| VL:S28   | AGC      | 90  | 27  | 57  | 21  | 878    | 151  | 150  | 102 | 208 | 118 | 45  | 23  | 925  | 658 | 131  | 65   | 72   |     | 166  | 57  | 52   | 33   | 107  | 163  | 106  | 117  | 78  | 44   | 96   | 164  | 152  |     |    |    |      |
| VL:I29   | ATT      | 1   | 1   |     |     | 12     | 15   | 13   | 9   | 10  | 41  | 2   |     |      | 22  | 10   | 7    | 11   |     | 3    | 54  | 3    | 17   | 3    | 7    | 26   | 12   | 9   | 17   | 16   | 91   | 203  |     |    |    |      |
| VL:G30   | GGG      | 320 | 49  | 254 | 192 | 2134   | 265  | 388  | 177 | 173 | 325 |     |     | 1019 | 715 | 143  | 214  | 935  | 85  | 362  | 108 | 10   | 585  | 324  | 260  | 817  | 125  | 135 | 3549 | 1193 | 526  | 1222 |     |    |    |      |
| VL:T31   | ACT      | 144 | 8   | 112 | 10  | 92     | 306  | 228  | 166 | 367 | 210 | 9   | 9   | 90   | 142 | 26   | 47   | 626  | 99  | 420  | 287 | 101  | 59   | 2391 | 1591 | 267  | 343  | 253 | 711  | 643  | 85   | 653  |     |    |    |      |
| VL:N32   | AAT      | 4   | 10  | 1   | 7   | 11     | 73   | 4    | 10  |     |     | 396 | 3   | 2    | 3   | 5    | 8    | 1    | 3   | 17   |     |      | 8    | 6    | 16   | 10   | 29   | 2   | 4    | 1    | 21   | 42   | 10  | 3  |    |      |
| VL:I33   | ATC      | 4   | 6   | 2   | 4   | 2      | 5    | 34   | 113 | 3   | 7   |     |     | 2    | 14  | 17   | 15   |      | 5   | 2    | 7   | 1    | 17   | 16   | 68   | 17   | 8    | 9   | 7    | 15   | 6    | 68   | 4   |    |    |      |
| VL:H34   | CAC      | 1   | 1   | 6   | 1   | 3      | 8    | 7    | 2   |     | 104 | 9   | 3   | 11   |     | 12   | 4    | 5    | 7   |      |     | 1    | 9    | 7    | 6    | 5    | 3    | 11  | 4    | 10   | 14   | 14   | 16  |    |    |      |
| VL:Y50   | TAC      |     | 7   | 2   |     | 11     | 11   | 2    | 3   |     |     |     |     | 4    | 5   | 2    | 1    | 7    | 4   | 1    |     |      | 9    | 15   | 10   | 9    | 158  | 15  | 1    | 16   |      | 1    | 2   |    |    |      |
| VL:A51   | GCG      | 2   | 8   | 463 | 3   | 4      | 16   |      | 6   | 3   | 5   |     | 2   | 13   | 10  | 9    | 1    | 29   | 4   | 10   | 777 | 101  | 22   | 234  | 15   | 1    | 231  | 25  | 29   | 14   | 2    | 9    |     |    |    |      |
| VL:S52   | AGC      | 1   | 8   | 1   | 1   | 51     | 248  | 55   | 17  | 17  |     | 2   |     | 2    | 4   | 68   | 10   | 82   | 34  | 122  | 37  | 121  | 71   | 55   | 35   | 17   | 35   | 40  | 26   | 106  | 64   | 25   |     |    |    |      |
| VL:E53   | GAA      | 5   | 1   | 6   | 1   | 1      | 6    | 7    | 3   |     |     | 3   | 3   | 9    | 3   | 11   | 7    | 140  | 203 | 1    | 12  | 21   | 32   | 25   | 8    | 6    | 6    | 3   | 32   | 16   | 55   | 5    |     |    |    |      |
| VL:S54   | TCA      | 62  | 138 | 32  | 12  | 28     | 76   | 166  | 15  | 38  | 42  |     |     | 1    | 19  | 2    | 10   | 11   | 198 | 55   | 64  | 61   | 195  | 128  | 456  | 278  | 30   | 74  | 61   | 166  | 60   | 34   | 90  |    |    |      |
| VL:I55   | ATT      | 5   | 4   | 3   | 69  | 24     | 28   | 25   | 19  | 3   | 15  | 19  |     |      | 3   | 10   | 22   | 5    | 18  |      | 7   | 9    | 193  | 90   | 6    | 1    |      | 7   | 9    |      |      |      |     |    |    |      |
| VL:S56   | TCA      | 44  | 26  | 36  | 25  | 93     | 105  | 56   | 42  | 11  | 13  | 69  | 36  | 38   | 33  | 150  | 22   | 84   | 45  | 70   | 64  | 153  | 80   | 203  | 86   | 32   | 163  | 73  | 77   | 26   | 96   | 44   |     |    |    |      |
| VL:Q89   | CAG      | 6   |     | 10  | 1   | 6      | 4    | 11   | 4   | 10  | 43  | 2   |     | 31   | 4   | 9    | 7    | 14   |     |      |     | 17   | 4    | 41   | 12   | 8    | 12   | 5   | 11   | 4    | 17   | 4    | 12  | 8  |    |      |
| VL:Q90   | CAA      |     | 1   | 1   | 1   | 5      | 3    | 7    | 8   | 89  | 6   |     |     | 3    | 9   | 2    | 1    | 3    | 17  | 8    | 56  | 20   | 15   | 33   | 5    | 4    | 3    | 23  | 8    | 18   | 2    |      |     |    |    |      |
| VL:N91   | AAC      | 2   | 113 | 9   | 121 | 4      | 3    | 15   | 6   | 4   | 268 |     | 6   | 8    | 5   | 1390 | 1325 | 14   | 8   | 7    | 10  | 20   | 27   | 19   | 16   |      | 12   | 1   | 8    | 2    | 3426 | 4    |     |    |    |      |
| VL:N92   | AAC      | 613 | 111 | 43  | 5   | 1233</ |      |      |     |     |     |     |     |      |     |      |      |      |     |      |     |      |      |      |      |      |      |     |      |      |      |      |     |    |    |      |

TABLE S3

Hu225 enrichment ratios. Grey shade indicates codons with 10 or fewer occurrences; black indicates wild type codon. Distance to EGRF is shown in angstroms; contact residues (<5 angstroms) are shown in bold.

| position | WT codon | distance | AAG  | AAT  | ACG  | ACT   | AGG  | AGT  | ATG  | ATT   | CAG   | CAT  | CCG  | CCT  | CGG  | CGT  | CTG  | CTT   | GAG  | GAT  | GCG  | GCT  | GGG  | GGT  | GTG   | GTT   | TAT   | TGC  | TCT  | TGG    | TGT   | TTG   | TTT   |      |
|----------|----------|----------|------|------|------|-------|------|------|------|-------|-------|------|------|------|------|------|------|-------|------|------|------|------|------|------|-------|-------|-------|------|------|--------|-------|-------|-------|------|
| VH:N31   | AAC      | 4.6      | 0.00 | 1.04 | 5.29 | 3.50  | 0.16 | 0.56 | 0.59 | 5.53  | 0.87  | 0.00 | 0.00 | 0.24 | 0.05 | 0.14 | 0.48 | 0.14  | 4.59 | 0.57 | 0.53 | 0.18 | 0.08 | 7.82 | 5.98  | 0.35  | 0.27  | 0.72 | 0.74 | 0.11   | 0.09  | 0.47  |       |      |
| VH:Y32   | TAC      | 6.8      | 0.03 | 0.72 | 0.15 | 0.11  | 5.90 | 0.00 | 3.05 | 0.14  | 0.05  | 0.28 | 0.00 | 7.22 | 6.61 | 0.07 | 0.08 | 0.00  | 0.10 | 0.08 | 0.03 | 0.05 | 0.01 | 0.09 | 0.04  | 0.96  | 0.20  | 0.07 | 4.48 | 0.05   | 0.10  | 0.08  |       |      |
| VH:G33   | GGC      | 8.8      | 0.00 | 0.06 | 0.00 | 0.10  | 0.09 | 0.09 | 0.03 | 0.04  | 0.00  | 0.00 | 0.05 | 0.01 | 0.01 | 0.07 | 0.02 | 5.63  | 8.11 | 9.15 | 9.87 | 1.96 | 0.88 | 0.02 | 0.02  | 0.03  | 0.02  | 0.06 | 0.05 | 0.01   | 0.05  | 0.03  |       |      |
| VH:V34   | GTC      | 13.5     | 2.50 | 8.13 | 0.06 | 0.69  | 0.03 | 1.94 | 1.83 | 3.99  | 4.12  | 0.02 | 0.01 | 0.00 | 0.24 | 6.98 | 5.84 | 6.66  | 0.09 | 0.63 | 0.49 | 0.08 | 0.09 | 1.53 | 1.39  | 0.01  | 1.06  | 1.17 | 0.03 | 3.44   | 8.95  | 0.06  |       |      |
| VH:H35   | CAC      | 7.4      | 0.00 | 0.00 | 0.20 | 0.06  | 0.00 | 0.00 | 0.00 | 0.04  | 0.23  | 1.37 | 0.06 | 0.28 | 0.05 | 0.02 | 0.03 | 0.02  | 0.11 | 0.07 | 0.05 | 0.04 | 0.06 | 0.06 | 0.03  | 0.04  | 0.08  | 0.09 | 0.07 | 0.06   | 0.03  | 0.09  | 0.03  |      |
| VH:V50   | GTG      | 6.0      | 0.83 | 3.77 | 0.00 | 0.05  | 0.09 | 0.04 | 2.80 | 10.09 | 12.73 | 0.00 | 0.04 | 0.00 | 0.00 | 0.02 | 6.89 | 10.87 | 7.11 | 0.00 | 0.24 | 0.11 | 0.05 | 0.05 | 0.93  | 0.03  | 0.00  | 0.03 | 0.06 | 0.38   | 6.46  | 0.04  |       |      |
| VH:I51   | ATA      | 7.4      | 0.04 | 3.38 | 0.15 | 0.22  | 0.18 | 7.36 | 5.75 | 1.67  | 8.34  | 1.17 | 0.01 | 0.13 | 0.25 | 0.26 | 2.22 | 1.65  | 2.46 | 3.66 | 5.69 | 7.97 | 6.88 | 7.67 | 1.27  | 1.44  | 0.85  | 5.66 | 7.13 | 0.19   | 7.96  | 2.01  | 0.15  |      |
| VH:W52   | TGG      | 3.1      | 0.03 | 2.63 | 7.63 | 5.45  | 0.16 | 0.13 | 0.23 | 4.70  | 0.21  | 0.06 | 0.02 | 0.25 | 0.06 | 0.32 | 0.19 | 0.04  | 0.04 | 0.01 | 0.05 | 6.74 | 8.62 | 0.55 | 0.84  | 0.15  | 0.04  | 0.00 | 0.09 | 0.32   | 0.39  | 0.00  |       |      |
| VH:S53   | TCA      | 4.0      | 0.00 | 7.40 | 5.13 | 6.50  | 0.03 | 0.71 | 0.04 | 0.01  | 5.69  | 0.17 | 0.06 | 0.00 | 0.10 | 0.02 | 0.04 | 0.01  | 0.11 | 0.87 | 0.04 | 0.08 | 0.06 | 0.07 | 0.24  | 0.31  | 0.10  | 1.63 | 1.12 | 0.09   | 0.02  | 0.06  | 0.09  |      |
| VH:G54   | GGC      | 4.0      | 0.16 | 0.00 | 0.00 | 0.04  | 0.28 | 0.01 | 0.05 | 0.08  | 0.00  | 0.07 | 0.32 | 0.04 | 0.11 | 0.05 | 0.05 | 0.09  | 0.08 | 0.00 | 0.36 | 0.22 | 1.45 | 1.19 | 0.06  | 0.22  | 0.18  | 0.02 | 0.07 | 0.48   | 0.05  | 0.06  | 3.33  |      |
| VH:G55   | GGA      | 5.1      | 0.14 | 0.00 | 0.54 | 0.77  | 0.06 | 3.47 | 1.07 | 0.00  | 0.72  | 6.16 | 0.04 | 0.07 | 0.21 | 0.19 | 0.43 | 0.17  | 5.43 | 6.76 | 5.48 | 4.60 | 1.42 | 1.61 | 0.03  | 0.08  | 1.39  | 3.34 | 3.74 | 0.20   | 0.25  | 0.11  | 1.05  |      |
| VH:N56   | AAC      | 3.8      | 0.12 | 0.75 | 1.28 | 0.05  | 0.58 | 1.68 | 0.12 | 0.04  | 0.00  | 0.19 | 0.05 | 0.02 | 0.35 | 0.08 | 0.03 | 0.05  | 0.03 | 0.03 | 3.79 | 4.30 | 5.19 | 4.33 | 0.03  | 0.04  | 0.04  | 1.47 | 1.19 | 0.11   | 0.07  | 0.03  | 0.07  |      |
| VH:T57   | ACA      | 8.1      | 0.20 | 1.41 | 1.57 | 0.90  | 0.08 | 4.34 | 0.65 | 0.23  | 1.13  | 2.74 | 8.74 | 6.56 | 0.11 | 0.16 | 0.07 | 0.12  | 7.02 | 5.62 | 5.52 | 2.88 | 7.09 | 6.60 | 0.45  | 0.51  | 1.15  | 5.37 | 5.97 | 4.57   | 0.24  | 0.20  | 1.81  |      |
| VH:D58   | GAC      | 3.0      | 0.04 | 0.04 | 0.03 | 0.94  | 0.03 | 0.01 | 0.10 | 0.03  | 0.38  | 0.00 | 0.00 | 0.03 | 0.09 | 0.02 | 0.05 | 0.00  | 0.06 | 0.94 | 0.07 | 0.06 | 0.17 | 0.06 | 0.03  | 0.04  | 0.01  | 0.06 | 0.00 | 0.03   | 0.00  | 0.02  | 0.01  |      |
| VH:Y59   | TAC      | 11.0     | 2.55 | 4.55 | 3.56 | 2.05  | 0.81 | 5.91 | 4.60 | 1.14  | 5.95  | 8.65 | 7.07 | 5.08 | 0.73 | 0.90 | 2.52 | 2.85  | 7.76 | 4.17 | 4.98 | 6.46 | 4.48 | 4.62 | 0.74  | 0.73  | 1.26  | 7.56 | 5.50 | 6.73   | 5.62  | 3.23  | 5.24  |      |
| VH:N60   | AAC      | 7.8      | 0.05 | 1.07 | 1.48 | 0.79  | 0.08 | 0.99 | 0.14 | 1.15  | 0.18  | 0.02 | 0.04 | 0.24 | 0.11 | 0.00 | 0.29 | 0.10  | 0.02 | 8.40 | 0.94 | 0.86 | 0.14 | 0.29 | 0.51  | 0.43  | 0.35  | 0.86 | 0.32 | 3.85   | 0.10  | 0.08  | 0.59  |      |
| VH:T61   | ACT      | 6.6      | 0.29 | 0.44 | 0.93 | 0.26  | 1.82 | 0.77 | 0.42 | 1.05  | 0.00  | 0.06 | 0.00 | 0.22 | 0.37 | 0.67 | 0.82 | 1.92  | 2.24 | 1.24 | 1.95 | 0.20 | 0.16 | 0.30 | 0.21  | 0.08  | 1.77  | 2.30 | 0.10 | 0.13   | 1.18  | 0.84  |       |      |
| VH:P62   | CCT      | 9.6      | 0.06 | 0.06 | 0.03 | 0.11  | 0.04 | 0.03 | 0.08 | 0.12  | 0.12  | 0.03 | 1.43 | 0.00 | 0.02 | 0.05 | 0.20 | 0.70  | 0.06 | 0.12 | 0.07 | 0.10 | 0.15 | 0.07 | 0.19  | 0.02  | 0.07  | 0.04 | 0.41 | 0.06   | 0.05  | 0.07  | 0.24  |      |
| VH:F63   | TTT      | 10.9     | 0.20 | 0.04 | 0.77 | 0.82  | 0.25 | 0.45 | 1.58 | 1.74  | 0.30  | 0.31 | 0.19 | 0.13 | 0.18 | 0.23 | 1.99 | 2.02  | 0.18 | 0.15 | 1.07 | 1.12 | 0.41 | 0.40 | 5.65  | 5.22  | 0.39  | 0.21 | 0.63 | 3.07   | 0.08  | 1.81  | 0.00  |      |
| VH:T64   | ACC      | 6.3      | 0.16 | 1.94 | 1.56 | 1.25  | 0.20 | 1.88 | 2.11 | 1.38  | 0.68  | 0.30 | 0.23 | 0.70 | 0.11 | 0.15 | 0.13 | 1.43  | 5.53 | 3.79 | 1.68 | 1.78 | 1.23 | 1.03 | 0.95  | 2.17  | 2.32  | 1.12 | 1.56 | 0.92   | 0.04  | 1.06  | 0.68  |      |
| VH:S65   | TCC      | 12.6     | 1.25 | 1.58 | 1.20 | 2.88  | 1.35 | 1.35 | 1.59 | 0.97  | 1.33  | 1.05 | 0.55 | 2.49 | 1.73 | 1.39 | 1.73 | 1.37  | 1.73 | 1.82 | 1.37 | 1.33 | 1.52 | 1.49 | 0.94  | 1.41  | 2.64  | 1.57 | 1.49 | 1.68   | 0.26  | 1.77  | 3.27  |      |
| VH:A95   | GCA      | 8.1      | 0.00 | 0.00 | 0.00 | 0.00  | 0.00 | 0.00 | 0.00 | 0.00  | 0.00  | 2.30 | 0.00 | 0.00 | 0.00 | 0.00 | 0.00 | 0.00  | 0.00 | 0.00 | 0.00 | 0.83 | 0.02 | 0.02 | 0.09  | 0.04  | 0.03  | 0.00 | 0.02 | 0.10   | 0.04  | 0.02  | 0.00  |      |
| VH:L96   | TTG      | 8.1      | 0.09 | 0.00 | 0.00 | 0.00  | 0.03 | 0.08 | 0.24 | 0.10  | 0.00  | 0.00 | 0.00 | 0.00 | 0.00 | 0.00 | 0.00 | 0.00  | 0.00 | 0.00 | 0.00 | 0.00 | 0.00 | 0.02 | 0.03  | 0.05  | 0.03  | 0.13 | 0.29 | 0.04   | 0.08  | 0.00  | 0.04  |      |
| VH:T97   | ACC      | 2.9      | 0.18 | 0.07 | 0.22 | 1.01  | 0.03 | 5.04 | 0.04 | 0.05  | 0.00  | 0.00 | 1.94 | 0.00 | 0.00 | 0.00 | 0.00 | 0.00  | 2.40 | 6.40 | 0.00 | 0.00 | 0.05 | 0.04 | 0.05  | 0.05  | 0.17  | 0.06 | 0.05 | 0.07   | 0.07  | 0.04  | 0.00  |      |
| VH:Y98   | TAT      | 3.9      | 0.03 | 0.03 | 0.05 | 0.05  | 0.07 | 0.04 | 0.05 | 0.11  | 0.06  | 0.11 | 0.06 | 0.03 | 0.08 | 0.07 | 0.06 | 0.11  | 0.01 | 0.06 | 0.02 | 0.09 | 0.00 | 0.00 | 0.05  | 0.03  | 0.00  | 0.01 | 0.04 | 4.82   | 0.11  | 0.10  | 0.12  |      |
| VH:Y99   | TAC      | 2.7      | 0.00 | 0.00 | 0.80 | 0.00  | 0.01 | 0.00 | 0.02 | 0.00  | 0.00  | 0.00 | 0.00 | 0.00 | 0.00 | 0.00 | 0.00 | 0.00  | 0.02 | 0.39 | 0.00 | 0.00 | 0.03 | 0.06 | 0.04  | 0.06  | 1.04  | 0.06 | 0.04 | 0.07   | 0.04  | 0.02  | 0.00  |      |
| VH:D100  | GAC      | 2.9      | 2.63 | 0.00 | 0.00 | 0.80  | 0.05 | 0.04 | 0.04 | 0.00  | 0.00  | 0.00 | 0.00 | 0.00 | 0.00 | 0.00 | 0.00 | 0.00  | 0.00 | 1.14 | 0.00 | 0.00 | 0.04 | 0.02 | 0.01  | 0.07  | 0.00  | 0.00 | 0.02 | 0.04   | 0.05  | 0.19  | 0.00  |      |
| VH:Y100a | TAC      | 3.0      | 0.00 | 0.00 | 0.83 | 0.03  | 0.03 | 0.04 | 0.02 | 0.00  | 0.00  | 0.00 | 0.00 | 0.00 | 0.00 | 0.00 | 0.00 | 0.00  | 0.03 | 0.00 | 0.00 | 0.00 | 0.03 | 0.06 | 0.02  | 0.02  | 1.01  | 0.00 | 0.49 | 0.03   | 0.16  | 0.05  | 0.00  |      |
| VH:E100b | GAG      | 4.2      | 0.18 | 0.30 | 0.00 | 0.03  | 0.14 | 0.06 | 0.01 | 0.00  | 0.00  | 0.00 | 0.00 | 0.00 | 0.00 | 0.00 | 0.00 | 0.00  | 0.54 | 0.00 | 0.00 | 0.03 | 0.05 | 0.03 | 0.03  | 0.00  | 0.00  | 0.02 | 0.03 | 0.05   | 0.01  | 0.00  |       |      |
| VH:F100c | TTT      | 9.4      | 0.02 | 0.00 | 0.00 | 0.00  | 0.01 | 0.03 | 0.00 | 0.01  | 0.00  | 0.00 | 0.00 | 0.00 | 0.00 | 0.00 | 0.00 | 0.00  | 0.01 | 0.05 | 0.00 | 0.03 | 0.06 | 0.04 | 0.04  | 14.19 | 0.54  | 0.00 | 0.88 | 0.00   | 0.05  | 1.09  | 0.00  |      |
| VH:A101  | GCT      | 11.4     | 0.00 | 2.45 | 0.32 | 0.18  | 0.41 | 0.22 | 0.05 | 0.00  | 0.00  | 0.00 | 0.00 | 0.00 | 0.00 | 0.00 | 0.00 | 0.60  | 0.17 | 0.04 | 0.18 | 0.07 | 0.05 | 0.11 | 0.29  | 0.67  | 0.00  | 0.46 | 0.05 | 0.68   | 0.03  | 0.13  | 0.00  |      |
| VH:Y102  | TAC      | 12.5     | 0.00 | 0.00 | 0.57 | 0.03  | 0.07 | 0.07 | 0.11 | 0.00  | 0.00  | 0.00 | 0.00 | 0.00 | 0.00 | 0.00 | 0.00 | 0.00  | 0.02 | 0.02 | 0.00 | 0.03 | 0.04 | 0.25 | 0.09  | 0.96  | 0.04  | 0.00 | 0.04 | 0.05   | 0.03  | 0.94  | 0.00  |      |
| VL:R24   | CGG      | 13.5     | 1.06 | 0.99 | 1.05 | 2.22  | 1.01 | 1.45 | 1.69 | 4.68  | 1.33  | 0.10 | 7.54 | 7.37 | 0.68 | 1.82 | 1.94 | 2.45  | 4.44 | 1.56 | 2.56 | 1.17 | 1.90 | 2.76 | 3.20  | 3.71  | 0.84  | 0.24 | 2.58 | 2.20   | 3.62  | 4.33  | 0.00  |      |
| VL:A25   | GCC      | 10.4     | 0.01 | 0.27 | 8.55 | 8.93  | 0.08 | 7.12 | 9.76 | 8.52  | 0.02  | 1.58 | 7.38 | 5.51 | 0.04 | 0.13 | 9.46 | 10.44 | 0.09 | 0.02 | 0.88 | 0.59 | 0.08 | 0.21 | 10.70 | 9.71  | 7.44  | 7.25 | 7.80 | 0.87   | 11.60 | 10.63 | 9.81  | 0.00 |
| VL:S26   | AGT      | 7.1      | 0.24 | 1.73 | 5.08 | 2.64  | 0.14 | 0.00 | 0.03 | 0.02  | 0.24  | 0.03 | 0.19 | 0.00 | 0.21 | 0.06 | 0.03 | 0.06  | 0.38 | 4.23 | 0.11 | 0.03 | 0.13 | 0.70 | 0.04  | 0.10  | 0.09  | 0.81 | 0.50 | 0.06   | 0.11  | 0.13  | 0.05  | 0.00 |
| VL:Q27   | CAG      | 3.7      | 0.04 | 0.35 | 0.61 | 0.88  | 0.03 | 0.24 | 0.27 | 0.09  | 0.13  | 1.93 | 0.17 | 0.08 | 0.09 | 0.06 | 0.61 | 0.07  | 7.20 | 4.22 | 0.36 | 0.24 | 0.11 | 0.03 | 0.63  | 1.20  | 10.47 | 0.47 | 0.17 | 8.86   | 0.06  | 0.03  | 10.87 | 0.00 |
| VL:S28   | AGC      | 6.7      | 2.37 | 0.36 | 0.66 | 0.45  | 5.57 | 0.73 | 1.44 | 1.15  | 2.12  | 1.21 | 0.44 | 0.25 | 5.57 | 6.00 | 1.44 | 0.43  | 0.44 | 0.00 | 0.70 | 0.44 | 0.17 | 0.12 | 0.49  | 0.64  | 1.21  | 1.52 | 0.69 | 0.97   | 0.54  | 0.77  | 0.89  |      |
| VL:I29   | ATT      | 7.3      | 0.02 | 0.01 | 0.00 | 0.20  | 0.06 | 0.08 | 0.09 | 0.00  | 1.08  | 0.03 | 0.00 | 0.09 | 0.10 | 0.08 | 0.23 | 0.00  | 0.08 | 0.47 | 0.04 | 0.06 | 0.01 | 0.03 | 0.16  | 0.18  | 0.15  | 0.30 | 0.06 | 0.09   | 0.41  | 1.46  | 0.00  |      |
| VL:G30   | GGG      | 9.0      | 8.63 | 1.79 | 8.10 | 10.61 | 3.80 | 3.00 | 7.57 | 2.94  | 4.76  | 7.87 | 0.00 | 0.00 | 7.96 | 7.34 | 2.06 | 2.98  | 1.64 | 0.61 | 1.77 | 1.10 | 0.79 | 0.46 | 0.81  | 11.51 | 3.03  | 3.80 | 4.75 | 6.75</ |       |       |       |      |

TABLE S4

Sequencing data and enrichment ratios (ERs) for 71 synonymous wild type hu225 codons.

| Position | WT AA | WT codon | synonymous codon | BIND count | BIND reads | BIND freq/1000 | EXP count | EXP reads | EXP freq/1000 | ER   |
|----------|-------|----------|------------------|------------|------------|----------------|-----------|-----------|---------------|------|
| VH:N31   | N     | AAC      | AAT              | 56         | 152,333    | 0.368          | 61        | 172,135   | 0.354         | 1.04 |
| VH:Y32   | Y     | TAC      | TAT              | 207        | 152,333    | 1.359          | 244       | 172,135   | 1.417         | 0.96 |
| VH:G33   | G     | GGC      | GGG              | 271        | 152,333    | 1.779          | 156       | 172,135   | 0.906         | 1.96 |
|          |       |          | GGT              | 393        | 152,333    | 2.58           | 504       | 172,135   | 2.928         | 0.88 |
| VH:V34   | V     | GTC      | GTG              | 268        | 152,333    | 1.759          | 198       | 172,135   | 1.150         | 1.53 |
|          |       |          | GTT              | 651        | 152,333    | 4.274          | 531       | 172,135   | 3.085         | 1.39 |
| VH:H35   | H     | CAC      | CAT              | 155        | 152,333    | 1.018          | 128       | 172,135   | 0.744         | 1.37 |
| VH:V50   | V     | GTG      | GTT              | 230        | 139,375    | 1.65           | 285       | 160,766   | 1.773         | 0.93 |
| VH:I51   | I     | ATA      | ATT              | 181        | 139,375    | 1.299          | 125       | 160,766   | 0.778         | 1.67 |
| VH:S53   | S     | TCA      | AGT              | 44         | 139,375    | 0.316          | 72        | 160,766   | 0.448         | 0.71 |
|          |       |          | TCG              | 251        | 139,375    | 1.801          | 178       | 160,766   | 1.107         | 1.63 |
|          |       |          | TCT              | 109        | 139,375    | 0.782          | 112       | 160,766   | 0.697         | 1.12 |
| VH:G54   | G     | GGC      | GGG              | 590        | 139,375    | 4.233          | 468       | 160,766   | 2.911         | 1.45 |
|          |       |          | GGT              | 598        | 139,375    | 4.291          | 579       | 160,766   | 3.602         | 1.19 |
| VH:G55   | G     | GGA      | GGG              | 668        | 139,375    | 4.793          | 544       | 160,766   | 3.384         | 1.42 |
|          |       |          | GGT              | 672        | 139,375    | 4.822          | 480       | 160,766   | 2.986         | 1.61 |
| VH:N56   | N     | AAC      | AAT              | 117        | 139,375    | 0.839          | 180       | 160,766   | 1.120         | 0.75 |
| H:T57    | T     | ACA      | ACG              | 113        | 139,375    | 0.811          | 83        | 160,766   | 0.516         | 1.57 |
|          |       |          | ACT              | 77         | 139,375    | 0.552          | 99        | 160,766   | 0.616         | 0.90 |
| VH:D58   | D     | GAC      | GAT              | 206        | 139,375    | 1.478          | 252       | 160,766   | 1.567         | 0.94 |
| VH:Y59   | Y     | TAC      | TAT              | 398        | 139,375    | 2.856          | 363       | 160,766   | 2.258         | 1.26 |
| VH:N60   | N     | AAC      | AAT              | 137        | 139,375    | 0.983          | 148       | 160,766   | 0.921         | 1.07 |
| VH:T61   | T     | ACT      | ACG              | 151        | 139,375    | 1.083          | 188       | 160,766   | 1.169         | 0.93 |
| VH:P62   | P     | CCT      | CCG              | 251        | 139,375    | 1.801          | 203       | 160,766   | 1.263         | 1.43 |
| VH:T64   | T     | ACC      | ACG              | 215        | 139,375    | 1.543          | 159       | 160,766   | 0.989         | 1.56 |
|          |       |          | ACT              | 200        | 139,375    | 1.435          | 184       | 160,766   | 1.145         | 1.25 |
| VH:S65   | S     | TCC      | AGT              | 172        | 139,375    | 1.234          | 147       | 160,766   | 0.914         | 1.35 |
|          |       |          | TCG              | 150        | 139,375    | 1.076          | 110       | 160,766   | 0.684         | 1.57 |
|          |       |          | TCT              | 136        | 139,375    | 0.976          | 105       | 160,766   | 0.653         | 1.49 |
| VH:A95   | A     | GCA      | GCG              | 18         | 140,847    | 0.128          | 24        | 154,976   | 0.155         | 0.83 |
| VH:L96   | L     | TTG      | CTG              | 14         | 140,847    | 0.099          | 13        | 154,976   | 0.084         | 1.18 |
| VH:T97   | T     | ACC      | ACG              | 9          | 140,847    | 0.064          | 46        | 154,976   | 0.297         | 0.22 |
|          |       |          | ACT              | 78         | 140,847    | 0.554          | 85        | 154,976   | 0.548         | 1.01 |
| VH:Y99   | Y     | TAC      | TAT              | 166        | 140,847    | 1.179          | 175       | 154,976   | 1.129         | 1.04 |
| VH:D100  | D     | GAC      | GAT              | 99         | 140,847    | 0.703          | 96        | 154,976   | 0.619         | 1.14 |
| VH:Y100a | Y     | TAC      | TAT              | 137        | 140,847    | 0.973          | 149       | 154,976   | 0.961         | 1.01 |
| VH:F100c | F     | TTC      | TTT              | 345        | 140,847    | 2.449          | 348       | 154,976   | 2.246         | 1.09 |
| VH:A101  | A     | GCT      | GCG              | 3          | 140,847    | 0.021          | 18        | 154,976   | 0.116         | 0.18 |
| VH:Y102  | Y     | TAC      | TAT              | 113        | 140,847    | 0.802          | 130       | 154,976   | 0.839         | 0.96 |
| VL:R24   | R     | CGG      | AGG              | 606        | 127,465    | 4.754          | 726       | 154,397   | 4.702         | 1.01 |
|          |       |          | CGT              | 168        | 127,465    | 1.318          | 300       | 154,397   | 1.943         | 0.68 |
| VL:A25   | A     | GCC      | GCG              | 203        | 127,465    | 1.593          | 281       | 154,397   | 1.820         | 0.88 |
|          |       |          | GCT              | 159        | 127,465    | 1.247          | 327       | 154,397   | 2.118         | 0.59 |
| VL:S26   | S     | AGT      | TCG              | 155        | 127,465    | 1.216          | 232       | 154,397   | 1.503         | 0.81 |
|          |       |          | TCT              | 80         | 127,465    | 0.628          | 194       | 154,397   | 1.257         | 0.50 |
| VL:S28   | S     | AGC      | AGT              | 151        | 127,465    | 1.185          | 249       | 154,397   | 1.613         | 0.73 |
|          |       |          | TCG              | 117        | 127,465    | 0.918          | 93        | 154,397   | 0.602         | 1.52 |
|          |       |          | TCT              | 78         | 127,465    | 0.612          | 137       | 154,397   | 0.887         | 0.69 |
| VL:G30   | G     | GGG      | GGT              | 585        | 127,465    | 4.589          | 900       | 154,397   | 5.829         | 0.79 |
| VL:T31   | T     | ACT      | ACG              | 112        | 127,465    | 0.879          | 59        | 154,397   | 0.382         | 2.30 |
| VL:I33   | I     | ATC      | ATT              | 113        | 127,465    | 0.887          | 160       | 154,397   | 1.036         | 0.86 |
| VL:H34   | H     | CAC      | CAT              | 104        | 127,465    | 0.816          | 194       | 154,397   | 1.257         | 0.65 |
| VL:Y50   | Y     | TAC      | TAT              | 158        | 129,373    | 1.221          | 199       | 153,122   | 1.300         | 0.94 |
| VL:A51   | A     | GCG      | GCT              | 777        | 129,373    | 6.006          | 1020      | 153,122   | 6.661         | 0.90 |
| VL:S52   | S     | AGC      | AGT              | 248        | 129,373    | 1.917          | 369       | 153,122   | 2.410         | 0.80 |
|          |       |          | TCG              | 35         | 129,373    | 0.271          | 63        | 153,122   | 0.411         | 0.66 |
|          |       |          | TCT              | 40         | 129,373    | 0.309          | 47        | 153,122   | 0.307         | 1.01 |
| VL:E53   | E     | GAA      | GAG              | 140        | 129,373    | 1.082          | 251       | 153,122   | 1.639         | 0.66 |
| VL:S54   | S     | TCA      | AGT              | 76         | 129,373    | 0.587          | 110       | 153,122   | 0.718         | 0.82 |
|          |       |          | TCG              | 74         | 129,373    | 0.572          | 131       | 153,122   | 0.856         | 0.67 |
|          |       |          | TCT              | 61         | 129,373    | 0.472          | 126       | 153,122   | 0.823         | 0.57 |
| VL:S56   | S     | TCA      | AGT              | 105        | 129,373    | 0.812          | 199       | 153,122   | 1.300         | 0.62 |
|          |       |          | TCG              | 163        | 129,373    | 1.26           | 202       | 153,122   | 1.319         | 0.96 |
|          |       |          | TCT              | 73         | 129,373    | 0.564          | 99        | 153,122   | 0.647         | 0.87 |
| VL:Q90   | Q     | CAA      | CAG              | 89         | 123,483    | 0.721          | 195       | 150,630   | 1.295         | 0.56 |
| VL:N91   | N     | AAC      | AAT              | 113        | 123,483    | 0.915          | 119       | 150,630   | 0.790         | 1.16 |
| VL:N92   | N     | AAC      | AAT              | 111        | 123,483    | 0.899          | 116       | 150,630   | 0.770         | 1.17 |
| VL:P95   | P     | CCT      | CCG              | 51         | 123,483    | 0.413          | 92        | 150,630   | 0.611         | 0.68 |
| VL:T96   | T     | ACA      | ACG              | 178        | 123,483    | 1.441          | 235       | 150,630   | 1.560         | 0.92 |
|          |       |          | ACT              | 466        | 123,483    | 3.774          | 354       | 150,630   | 2.350         | 1.61 |
| VL:T97   | T     | ACT      | ACG              | 116        | 123,483    | 0.939          | 140       | 150,630   | 0.929         | 1.01 |

**TABLE S5**

**Sequencing data, enrichment ratios (ERs) and rank out of 1662 total codon variants for amino acid mutations occurring in previously characterized higher affinity variants of the CDRs of cetuximab/Mab225.** Beidler, amino acid variants from phage display affinity maturation; Lippow, variants from *in silico* prediction (see references in main text).

| MUTANT    | WT codon | MUTANT codon | BIND count | BIND read | BIND freq./1000 | EXP count | EXP read | EXP freq./1000 | ER    | rank/1662 | REFERENCE |
|-----------|----------|--------------|------------|-----------|-----------------|-----------|----------|----------------|-------|-----------|-----------|
| VH:Y32W   | TAC      | TGG          | 706        | 152,333   | 4.64            | 178       | 172,135  | 1.03           | 4.48  | 165       | Beidler   |
| VH:G33A   | GGC      | GCT          | 821        | 152,333   | 5.39            | 94        | 172,135  | 0.55           | 9.87  | 26        | Beidler   |
|           |          | GCG          | 874        | 152,333   | 5.74            | 108       | 172,135  | 0.63           | 9.15  | 34        | Beidler   |
| VH:G33D   | GGC      | GAT          | 539        | 152,333   | 3.54            | 75        | 172,135  | 0.44           | 8.11  | 54        | Beidler   |
| VH:G33E   | GGC      | GAG          | 424        | 152,333   | 2.78            | 85        | 172,135  | 0.49           | 5.63  | 124       | Beidler   |
| VH:V50N   | GTG      | AAT          | 72         | 139,375   | 0.52            | 22        | 160,766  | 0.14           | 3.77  | 189       | Beidler   |
| VH:N56A   | AAC      | GCT          | 410        | 139,375   | 2.94            | 110       | 160,766  | 0.68           | 4.30  | 172       | Beidler   |
|           |          | GCG          | 838        | 139,375   | 6.01            | 255       | 160,766  | 1.59           | 3.79  | 188       | Beidler   |
| VH:N56S   | AAC      | AGT          | 237        | 139,375   | 1.70            | 163       | 160,766  | 1.01           | 1.68  | 297       | Beidler   |
|           |          | TCG          | 212        | 139,375   | 1.52            | 166       | 160,766  | 1.03           | 1.47  | 323       | Beidler   |
|           |          | TCT          | 112        | 139,375   | 0.80            | 109       | 160,766  | 0.68           | 1.19  | 366       | Beidler   |
| VH:N56T   | AAC      | ACG          | 112        | 139,375   | 0.80            | 101       | 160,766  | 0.63           | 1.28  | 349       | Beidler   |
|           |          | ACT          | 2          | 139,375   | 0.01            | 49        | 160,766  | 0.31           | 0.05  | 1179      | Beidler   |
| VH:T57P   | ACA      | CCG          | 318        | 139,375   | 2.28            | 42        | 160,766  | 0.26           | 8.74  | 42        | Beidler   |
|           |          | CCT          | 74         | 139,375   | 0.53            | 13        | 160,766  | 0.08           | 6.56  | 102       | Beidler   |
| VH:T64A   | ACC      | GCT          | 99         | 139,375   | 0.71            | 64        | 160,766  | 0.40           | 1.78  | 284       | Beidler   |
|           |          | GCG          | 298        | 139,375   | 2.14            | 204       | 160,766  | 1.27           | 1.68  | 295       | Beidler   |
| VH:T64D   | ACC      | GAT          | 332        | 139,375   | 2.38            | 101       | 160,766  | 0.63           | 3.79  | 186       | Beidler   |
| VH:T64N   | ACC      | AAT          | 192        | 139,375   | 1.38            | 114       | 160,766  | 0.71           | 1.94  | 266       | Beidler   |
| VH:T97D   | ACC      | GAT          | 837        | 140,847   | 5.94            | 144       | 154,976  | 0.93           | 6.40  | 108       | Beidler   |
| VH:E100bD | GAG      | GAT          | 41         | 140,847   | 0.29            | 83        | 154,976  | 0.54           | 0.54  | 547       | Beidler   |
| VH:E100bN | GAG      | AAT          | 5          | 140,847   | 0.04            | 18        | 154,976  | 0.12           | 0.30  | 644       | Beidler   |
| VH:F100cY | TTC      | TAT          | 154        | 140,847   | 1.09            | 12        | 154,976  | 0.08           | 14.19 | 1         | Beidler   |
| VL:S26D   | AGT      | GAT          | 430        | 127,465   | 3.37            | 123       | 154,397  | 0.80           | 4.23  | 175       | Lippow    |
| VL:Q27E   | CAG      | GAG          | 1,040      | 127,465   | 8.16            | 175       | 154,397  | 1.13           | 7.20  | 80        | Beidler   |
| VL:Q27F   | CAG      | TTT          | 1,149      | 127,465   | 9.01            | 128       | 154,397  | 0.83           | 10.87 | 14        | Beidler   |
| VL:Q27H   | CAG      | CAT          | 763        | 127,465   | 5.99            | 480       | 154,397  | 3.11           | 1.93  | 271       | Beidler   |
| VL:Q27Y   | CAG      | TAT          | 1,400      | 127,465   | 10.98           | 162       | 154,397  | 1.05           | 10.47 | 21        | Beidler   |
| VL:T31E   | ACT      | GAG          | 626        | 127,465   | 4.91            | 150       | 154,397  | 0.97           | 5.05  | 148       | Lippow    |
| VL:N93A   | AAT      | GCG          | 1,530      | 123,483   | 12.39           | 211       | 150,630  | 1.40           | 8.84  | 41        | Lippow    |
|           |          | GCT          | 800        | 123,483   | 6.48            | 119       | 150,630  | 0.79           | 8.20  | 52        | Lippow    |
| VL:N93D   | AAT      | GAT          | 690        | 123,483   | 5.59            | 111       | 150,630  | 0.74           | 7.58  | 66        | Beidler   |
| VL:N93E   | AAT      | GAG          | 1,129      | 123,483   | 9.14            | 137       | 150,630  | 0.91           | 10.05 | 25        | Beidler   |
| VL:N93K   | AAT      | AAG          | 14         | 123,483   | 0.11            | 105       | 150,630  | 0.70           | 0.16  | 773       | Beidler   |
| VL:T97S   | ACT      | TCT          | 653        | 123,483   | 5.29            | 64        | 150,630  | 0.43           | 12.44 | 7         | Beidler   |
|           |          | TCG          | 880        | 123,483   | 7.13            | 91        | 150,630  | 0.60           | 11.80 | 8         | Beidler   |
|           |          | AGT          | 1,798      | 123,483   | 14.56           | 203       | 150,630  | 1.35           | 10.80 | 16        | Beidler   |



TABLE S6

FACS based affinity analysis of higher affinity hu225 variants. FACS (xWT), ratio of MFI for 1.0 nM EGFR-C $\lambda$ -AF647 antigen to compared to wild type hu225. Beidler, amino acid variants from phage display affinity maturation; Lippow, variants from in silico prediction (see references in main text).

| CDR     | MUTANT  | reference           | ER for codon(s)    | codon rank(s)/1662 | FACS (xWT) |      |
|---------|---------|---------------------|--------------------|--------------------|------------|------|
| H1      | VH:N31V |                     | 7.82, 5.98         | 61, 113            | 3.6        |      |
|         | VH:Y32R |                     | 7.22, 6.61, 5.90   | 79, 100, 117       | 3.6        |      |
|         | VH:G33A | Biedler             | 9.87, 9.15         | 26, 34             | 6.3        |      |
|         | VH:G33D | Biedler             | 8.11               | 54                 | 10.0       |      |
|         | VH:V34L |                     | 8.95, 6.98, 5.64   | 37, 89, 123        | 3.5        |      |
|         | VH:V34N |                     | 8.13               | 53                 | 4.2        |      |
| H2      | VH:V50L |                     | 10.87, 6.89, 6.46  | 15, 90, 104        | 7.6        |      |
|         | VH:V50Q |                     | 12.73              | 3                  | 7.0        |      |
|         | VH:I51G |                     | 7.67, 6.88         | 64, 92             | 6.4        |      |
|         | VH:I51M |                     | 5.75               | 118                | 3.5        |      |
|         | VH:I51Q |                     | 8.34               | 51                 | 3.4        |      |
|         | VH:I51S |                     | 7.36, 7.13, 5.66   | 75, 82, 121        | 2.6        |      |
|         | VH:W52G |                     | 8.62, 6.74         | 45, 97             | 5.0        |      |
|         | VH:W52T |                     | 7.63, 5.45         | 65, 135            | 4.0        |      |
|         | VH:S53Q |                     | 5.69               | 119                | 4.0        |      |
|         | VH:S53T |                     | 6.50, 5.13         | 103, 145           | 3.1        |      |
|         | VH:G55D |                     | 6.76               | 94                 | 5.5        |      |
|         | VH:N56G |                     | 5.19, 4.33         | 142, 170           | 5.2        |      |
|         | VH:T57A |                     | 5.52               | 131                | 1.9        |      |
|         | VH:T57D | Biedler             | 5.62               | 125                | 2.3        |      |
|         | VH:T57G |                     | 7.09, 6.60         | 85, 101            | 4.8        |      |
|         | VH:T57P | Biedler             | 8.74, 6.56         | 42, 102            | 6.3        |      |
|         | VH:T57S |                     | 5.97, 5.37, 4.34   | 114, 138, 169      | 2.1        |      |
|         | VH:Y59A |                     | 6.46, 4.98         | 105, 150           | 2.3        |      |
|         | VH:Y59C |                     | 5.62               | 126                | 2.2        |      |
|         | VH:Y59E |                     | 7.76               | 63                 | 4.3        |      |
|         | VH:Y59F |                     | 5.24               | 140                | 2.1        |      |
|         | VH:Y59G |                     | 4.62, 4.48         | 157, 163           | 1.9        |      |
|         | VH:Y59H |                     | 8.56               | 43                 | 1.6        |      |
|         | VH:Y59S |                     | 7.56, 5.91, 5.50   | 68, 116, 133       | 3.6        |      |
|         | VH:Y59W |                     | 6.73               | 98                 | 2.6        |      |
|         | VH:N60D |                     | 8.4                | 49                 | 3.0        |      |
|         | VH:F63V |                     | 5.65, 5.22         | 122, 141           | 1.8        |      |
|         | VH:T64E |                     | 5.53               | 120                | 1.9        |      |
|         | H3      | VH:T97D             | Biedler            | 6.4                | 108        | 11.3 |
|         |         | VH:Y98W             |                    | 4.82               | 151        | 1.9  |
|         | L1      | VH:F100cY           | Biedler            | 14.19              | 1          | 3.1  |
|         |         | VL:R24P             |                    | 7.54, 7.37         | 69, 74     | 2.0  |
|         |         | VL:A25C             |                    | 11.6               | 10         | 3.1  |
|         | VL:A25F |                     | 9.81               | 27                 | 2.3        |      |
|         | VL:A25L |                     | 10.63, 10.44, 9.46 | 18, 22, 31         | 1.7        |      |
|         | VL:A25M |                     | 9.76               | 28                 | 2.0        |      |
|         | VL:A25S |                     | 7.80, 7.25, 7.12   | 62, 78, 83         | 2.3        |      |
|         | VL:A25V |                     | 10.70, 9.71        | 17, 29             | 4.5        |      |
|         | VL:Q27W |                     | 8.86               | 40                 | 2.5        |      |
|         | VL:Q27Y | Biedler             | 10.47              | 21                 | 4.9        |      |
|         | VL:S28R |                     | 6.00, 5.57, 5.57   | 111, 127, 128      | 1.5        |      |
|         | VL:G30F |                     | 12.55              | 5                  | 1.7        |      |
|         | VL:G30M |                     | 7.57               | 67                 | 1.2        |      |
|         | VL:G30T |                     | 10.61, 8.10        | 19, 56             | 1.6        |      |
|         | VL:G30W |                     | 4.75               | 153                | 2.0        |      |
|         | VL:G30Y |                     | 11.51              | 11                 | 7.5        |      |
|         | VL:T31E | Lippow              | 5.05               | 148                | 1.2        |      |
|         | VL:T31V |                     | 8.11, 6.88         | 55, 91             | 1.4        |      |
| L3      | VL:N91L |                     | 10.47, 10.37, 9.03 | 20, 23, 36         | 2.3        |      |
|         | VL:N92L |                     | 12.53, 9.10, 5.45  | 6, 35, 136         | 3.0        |      |
|         | VL:N92R |                     | 11.01, 9.58, 9.42  | 13, 30, 33         | 3.1        |      |
|         | VL:N93A | Lippow              | 8.84, 8.20         | 41, 52             | 2.4        |      |
|         | VL:N93E | Biedler             | 10.05              | 25                 | 2.5        |      |
|         | VL:T97A |                     | 8.49, 6.76         | 48, 95             | 2.4        |      |
|         | VL:T97D |                     | 5.98               | 112                | 5.0        |      |
|         | VL:T97E |                     | 8.39               | 50                 | 3.5        |      |
|         | VL:T97G |                     | 7.32, 6.45         | 77, 106            | 1.6        |      |
|         | VL:T97H |                     | 11.67              | 9                  | 1.2        |      |
|         | VL:T97I |                     | 7.37               | 73                 | 1.7        |      |
|         | VL:T97L |                     | 11.36, 9.46, 5.13  | 12, 32, 144        | 1.9        |      |
| VL:T97S | Biedler | 12.44, 11.80, 10.80 | 7, 8, 16           | 6.5                |            |      |
